# 1 The Cellular Expression and Genetics of an 2 Established Polymorphism in *Poecilia reticulata*; 3 "Purple Body, (*Pb*)" is an Autosomal Dominant 4 Gene

5 Alan S. Bias<sup>1</sup> and Richard D. Squire<sup>2</sup>

6  
7 <sup>1</sup>Independent Researcher and Swordtail Guppy Breeder. Mailing address: P.O. Box 1508,  
8 Lewisburg, West Virginia 24901, USA. [orcid.org/0000-0002-9093-619X](http://orcid.org/0000-0002-9093-619X). [alansbias@aol.com](mailto:alansbias@aol.com)

9  
10 <sup>2</sup>Biology Department (retired), University of Puerto Rico, Mayaguez campus, Mayaguez,  
11 Puerto Rico, USA. Mailing address: P. O. Box 3227, Mayaguez, P.R., USA 00681-3227.  
12 [orcid.org/0000-0002-3916-0672](http://orcid.org/0000-0002-3916-0672). [rickdsquire@gmail.com](mailto:rickdsquire@gmail.com)

13  
14 **Abstract.** Modification of wild-type carotenoid orange and pteridine red coloration and spotting of male ornaments  
15 in both wild populations of *Poecilia reticulata* (Guppies) and modern Domestic Guppy strains by the Purple Body  
16 gene has long been overlooked in research articles and little understood in breeder publications. This modification is  
17 commonly found in wild-type *Poecilia reticulata reticulata* populations from numerous collection sites and has been  
18 photographed but not recognized in these collections. It is non-existent or near absent in collections taken from  
19 variant populations of *Poecilia reticulata wingei*. We identify and determine the mode of inheritance, cellular and  
20 phenotypic expression by the Purple gene in these stocks. The Purple Body color pigment modification is a distinct  
21 polymorphism in wild *P. reticulata reticulata* populations. Its existence suggests multiple benefits that satisfy female  
22 sexual selection preferences, and minimize or reduce potential predation risks. Photographic and microscopic  
23 evidence demonstrated that Purple Body is a normal polymorphism in wild and domestic guppies modifying color  
24 pigment regions. Purple Body is inherited as an autosomal incompletely dominant trait.

25 **Key Words:** Guppy color and modifications, chromatophore, violet iridophore, blue iridophore, violet-  
26 blue iridophore, xanthophore, xantho-erythrophore, Purple Guppy, Purple Body gene, Metal Gold  
27 Iridophore, *Poecilia reticulata*, *Poecilia obscura*, *Poecilia wingei*, Cumana' Guppy, Campoma Guppy,  
28 Endler's Livebearer.

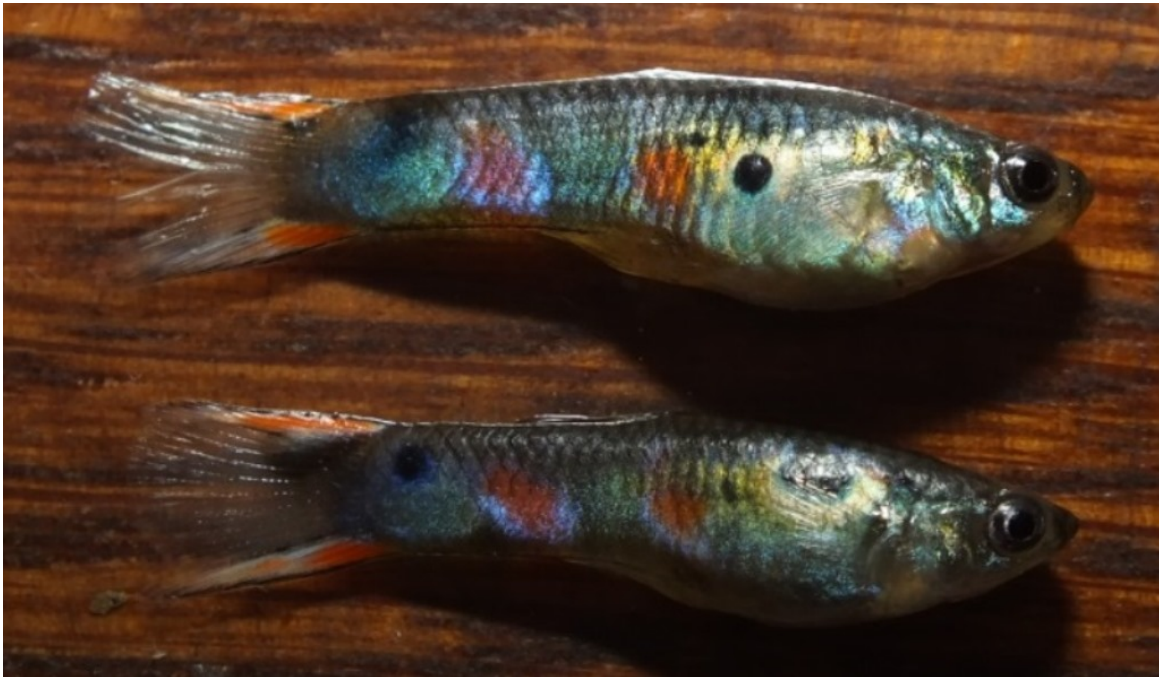

30  
31 **Fig 1.** Wild-type Purple Body (*Pb*) males in heterozygous condition.  
32

## 33 Introduction

34 The intent of this paper is multifold; 1. Identify the mode of inheritance of the Purple  
35 Body trait. 2. Provide photographic and microscopic exhibits of Purple Body and non-Purple  
36 Body for ease in identification. 3. To encourage future study interest at a cellular level of  
37 populations in which Purple Body highlights near-UV (Ultra-Violet) reflective qualities. 4.  
38 To stimulate molecular level studies of Purple Body and to identify the linkage group (LG) to  
39 which it belongs.

40 A generally accepted definition of polymorphism states: "(1) Polymorphism is the  
41 occurrence together in the same habitat of two or more distinct forms of a species in such  
42 proportions that the rarest of them cannot be maintained by recurrent mutation. (2) If a  
43 genetically controlled form occurs in even a few percent of a population it must have been  
44 favored by selection. (3) Polymorphism may either be transient, in which a gene is in  
45 process of spreading through a population unopposed, or balanced, in which it is maintained  
46 at a fixed level by a balance of selective agencies. (4) Owing to the recurrent nature of  
47 mutation, transient polymorphism is generally due to changes in the environment, which  
48 make the effects of a previously disadvantageous gene beneficial (Ford 1945)."

49 Wild *Poecilia reticulata*, both in native populations and feral introductions, exist in a  
50 previously undocumented polymorphic state; Purple Body and non-Purple Body. In  
51 Domestic strains both polymorphisms persist as a direct result of intended breeder  
52 intervention and as an unintended result of outcrosses between fixed phenotypic strains.  
53 Therefore, it is safe to assume that the co-existence of two sympatric phenotypes, in both  
54 wild and domestic stocks, must confer a selective advantage. The two most likely  
55 possibilities are reduction in predation and/or favoritism in sexual selection.

56 For nearly 100 years published research has focused on "heritability, brightness,  
57 intensity of orange chroma and hue in male ornaments (Winge 1922a, 1927; Lindholm  
58 2002; Deere 2012), most often in the context of sexual selective preference or  
59 environmental carotenoid intake. Over the last decades we have seen a gradual shift  
60 towards identification of benefits derived from the reflective qualities of iridophore biased  
61 phenotypes. This frequently involved the study of Opsin, and UV and near-UV spectrum  
62 vision in Guppies and their predators. Additional consideration was given to the nature of  
63 ornaments being composite traits with independent origins (Grether 2004).

64 *P. reticulata* pteridine based color appears as shades of red, while carotenoid color is  
65 more yellow-orange. The "wild-type" guppy red is maintained in a variety of environments  
66 by synthesizing sufficient pteridines to balance the amount of dietary carotenoids obtained  
67 from food sources. Iridophore development begins in embryonic stages, continues with  
68 onset of sexual maturity and is completed in young adulthood. Reflective qualities of  
69 iridophores increase with maturation and development of guanine crystals (Gundersen  
70 1982; Deere 2012). Intensity and reflective qualities of coloration are complemented by  
71 both underlying basal and ectopic melanophores.

72 Studies on extreme polymorphic variation found within Poeciliid species over the last  
73 100 years abound involving *P. reticulata*, *P. parae*, *P. picta*. For the most part those within  
74 wild *Poecilia reticulata* and *Poecilia reticulata wingei* have focused on "wild-type" orange  
75 color pigmentation of spotting; its benefits from carotenoid intake, Y-linked inheritance for  
76 spotting, female sexual selection preferences, and heterogametic benefits in the form of  
77 reduced predation on females. Of late emphasis has seen a shift towards benefits derived  
78 from both UV and near-UV coloration.

79 Xantho-erythrophores primarily utilize the absorbed carotenoids ingested from local  
80 dietary resources. Carotenoid availability produces variability in expression within and  
81 between populations (Grether 1999). This is in contrast to red drosoplerin based color  
82 pigment, which is synthesized by the individual *de novo* (Goodwin 1986). Male orange  
83 ornaments are the product of both orange carotenoids and red pteridine color pigments:  
84 drosopterins.

85 A direct correlation between carotenoid intake and higher levels of drosopterin synthesis  
86 has been identified. While pteridine red and tunaxanthin carotenoid orange were identified  
87 in male spotting, only the carotenoid orange was obtained from the algae in the  
88 environment in wild study populations (Grether 2001). Counter-gradient variability found in  
89 male orange ornaments from multiple locales has been documented (Grether 2005a,  
90 2005b; Deere 2012) as the result genetic differences between populations. The ratio of  
91 carotenoids and drosopterins had a direct effect on size and hue of orange spotting.

92 Research utilizing Domestic Guppies has proven both X and Y-linked inheritance for red  
93 color pigmentation in finnage (Khoo and Phang 1999). Documented results by Domestic  
94 Guppy Breeders reveal many strains have been produced with both X and Y-linked  
95 inheritance for red color pigment in both body and finnage. Many females capable of  
96 passing red in domestic Guppy stocks often express coloration, while others resembling wild  
97 color / tail neutral guppy females do not.

98 Wild-type female guppies in native locales, and domestic strains, lacking coloration are  
99 also capable of passing on unexpressed red color pigment to daughters and expressed color  
100 pigment to sons (Gordon 2012; Bias, *unpublished breeding results*). Such sexual  
101 dimorphism reduces predation on females, while allowing it to varying extents on males.  
102 Continued breeding's in Domestic strains are now showing that red color pigment is not  
103 simply the result of an XY-linked mode of inheritance, but are also suggestive of autosomal  
104 linkage as well. A recent publication involving red color morphs found within *Poecilia picta*  
105 supports this assertion (Lindholm 2015).

106 The purple phenotype has been present in hobbyist stocks for decades, but has been  
107 largely unrecognized except in the case of pure-bred all-purple strains, such as the Roebuck  
108 IFGA (International Fancy Guppy Association) Purple Delta described in Materials. The  
109 Purple tail guppy with purple iridescence on body and causal fins seems to be the same as  
110 the "all-purple" term we use here, and was studied in Ben et al. (2003), where they  
111 extensively studied and discussed the enzymatic processes involved in producing various  
112 pteridine pigments in the guppy. No formal description of genotype, in regard to the Purple  
113 tail guppy, was proffered or elucidated by the authors. Their "preliminary study  
114 concentrated on PTPS (*6-pyruvoyl tetrahydropterin synthase*), which is the main rate-  
115 limiting enzyme in the pteridine biosynthesis pathway ...and XDH (*xanthine dehydrogenase*),  
116 which is largely responsible for the catabolism of 7,8-dihydropterin to pigmented pteridines,  
117 including isoxanthopterin, xanthopterin, and leucopterin..."

118 They found that "Purple Tail, Diamond and Blue Metallic have silvery iridescent caudal  
119 fins resulting mainly from the presence of iridophores. Purple Tail looks more yellowish than  
120 Diamond and Blue Metallic, while Blue Metallic has deeper blue iridescence than Diamond.  
121 The PTPS mRNA levels were moderately expressed in these guppy varieties and appeared to  
122 be related to the density of the xanthophores." Purple tail and Diamond had a higher  
123 density of iridophores and a higher XDH expression than the other mentioned strains. They  
124 finally concluded that the Purple tail phenotype is produced by the action of iridophores that  
125 give a reflective blue effect (structural color) in this case, and xanthophores which contain  
126 yellow (and sometimes red/orange) pigments in particular.

127 Ben et al. also discussed the pteridine pigments in other color varieties of the guppy. But  
128 they did not discuss purple coloration found in strains with more complex purple, red,  
129 orange and yellow colors present in the same fish, nor did they investigate the inheritance  
130 of the purple gene. This senior author has presented the differences between "Purple Body",  
131 all-purple, red, and orange color patterns too many hobbyist groups both in the United  
132 States and internationally for a number of years. He discovered the microscopic differences  
133 between these two traits in chromatophore arrangements associated with red, orange,  
134 yellow, and purple spots. After discussions with the junior author, he refined these  
135 conclusions and then embarked upon a series of crosses designed to determine how the  
136 Purple Body gene is inherited. The junior author conducted the genetic analyses based upon  
137 the cross results, and co-authored the final paper.

138 Breeding tests involving this modification of orange spotting reveal this trait to have an  
139 incompletely dominant mode of inheritance. As such a formal name and nomenclature of  
140 **Purple Body (Pb)** is therefore suggested. [**Note:** Hereafter Purple Gene and Purple Body  
141 Gene are used interchangeably].  
142

## 143 **Description (Spectral Expression of Pb vs. non-Pb)**

144 A frequent and previously undescribed modification of “wild-type” orange color pigment  
145 exists within both wild and domestic stocks of Guppies. Visually, coloration is modified from  
146 a highly reflective orange to a “purplish-pink” coloration in Grey (*g*), Blond (*b*) and Golden  
147 (*g*) (Goodrich 1944), European Blau (*r*) (Dzwillo 1959) and Asian Blau (*Ab*) (*Undescribed* -  
148 see Bias 2015) variants, most vividly noticeable in grey and blond.

149 While this purplish-pink modification of individual and pattern spotting is readily visible  
150 in color drawings and photo plates of prior published results, descriptions have been  
151 generally limited to gene(s) at specific loci in reference to iridescence, red, orange,  
152 purpureus and rubra. Thus, indicating no formal documentation for the existence of a  
153 modifier gene of orange spotting (*see more later*). To further rule out the possibility of prior  
154 formal Pb description, an exhaustive review was made of published research to date. This  
155 including any early descriptions closely associated to “purple” and “red” coloration in body  
156 and finnage. Those identified include:

157 **A.** Purple Tail; The phenotypic name for an Asian commercial strain referenced in the 6-  
158 pyruvoyl tetrahydropterin synthase (*PTPS*) mRNA study. The pigment phenotype was  
159 simply listed as “Purple iridescence on body and caudal fins.” No formal description of  
160 trait(s) was made (Ben 2003).

161 **B.** Purpureus (*Pu*); Yellow and red dorsal pattern description (Natali and Natali 1931;  
162 Kirpichnikov 1981). No reference was made to modification of red color pigment.

163 **C.** Rubra (*ru* or *r*); 1. Red color proximally in the upper edge of the caudal fin. 2.  
164 Large oblong red side spot, lying for the most part below and behind the dorsal fin. 3.  
165 Dark side-dot in the tail at the base of the caudal fin (Winge 1922b). No reference  
166 made to modification of red color pigment.

167 **D.** Anterior Rubra (*ar*); Y-link mode of inheritance and allelic to *ru* complex (Blacher  
168 1928). No reference made to modification of red color pigment.

169 High resolution photography and microscopic study shows the co-existence of varying  
170 populations of both violet and blue structural iridophores in all individuals, both male and  
171 female (*Bias and Squire 2017b, Pb Microscopy Study, forthcoming*). Progressive focal  
172 adjustment failed to alter this violet coloration to blue. This is consistent with current  
173 Guppy research (*Figure 6C*, Kottler 2014; *Figure 5A'*, Kottler 2015) Betta research (*Figure*  
174 *1b* Khoo and Phang 2013), and Zebrafish research (*Figure 3*, Patterson 2013; *Figure 1H*,  
175 Mahalwar 2014; *Figure 2 and 3*, Singh 2015). Violet and blue structural iridophores and  
176 melanophores are always found in close proximity with one another. Forming a type of  
177 chromatophore unit [**Note:** hereafter referenced as violet-blue (iridophores) for ease of  
178 discussion]. Violet-blue iridophores (**Fig 2**) are most visible along the topline and in  
179 between regions lacking a clearly defined silver iridophore pattern, often including caudal-  
180 peduncle base.

181

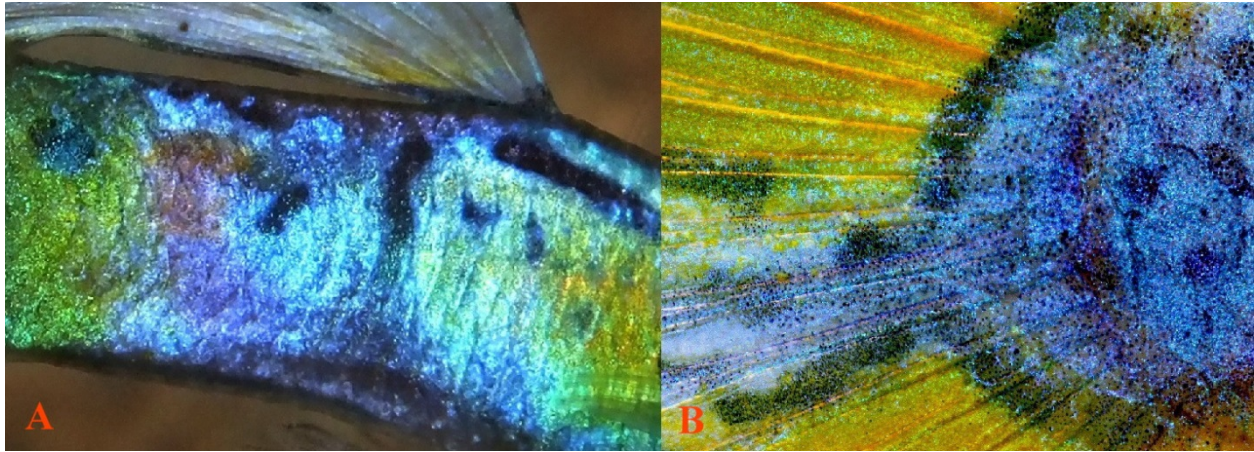

**Fig 2. (A)** Violet-blue Iridophores in peduncle, **(B)** Violet-blue iridophores in caudal, photo courtesy of Christian Lukhaup (right).

182  
183  
184  
185

186 Pb modification, zygosity dependent, removes certain classes of yellow-orange-red color  
187 pigment over silver iridophores or white leucophores. The term we use here, “white  
188 leucophore”, refers to a pigment cell type that was extensively studied both structurally and  
189 biochemically in Takeuchi (1976) and identified as a fourth chromatophore type. However  
190 Kottler, et al (2014) were not able to confirm the presence of leucophores based upon their  
191 physical structure. We were not able to determine whether the cells we observed were white  
192 leucophores or white iridophores, but will continue to refer to them here as leucophores.  
193 Pb modifies “other existing” color in both body and fins, thus suggestive of being a “full  
194 body” modifier, in homozygous fashion. Dark red pteridine color pigment does not seem to  
195 be modified by Purple Body in fins lacking an underlying silver iridophore or white  
196 leucophore pattern. Modification by Pb seems limited predominantly to wild-type orange  
197 color pigment; i.e. that which also contains yellow carotenoids in addition to red pteridines,  
198 over an iridophore pattern.

199 Pb is always found in all-purple fish, but is not by itself sufficient to produce the all-  
200 purple phenotype in heterozygous expression. Homozygous Pb expression resulting in  
201 further removal of xantho-erythrophores, in conjunction with both increased populations  
202 and/or the visibility of modified melanophores and naturally occurring violet-blue  
203 iridophores, is required for production of the all-purple phenotype. Violet is a true  
204 wavelength color, while Purple is a composite produced by combining blue and red  
205 wavelength colors. Thus, the violet-blue chromatophore unit and removal of xanthophores  
206 is required to produce an all-purple phenotype.

207 Based on breeding results, phenotypic observation and microscopic study, further  
208 observations are offered. Expressivity of Pb is not only highly variable, but also zygosity  
209 dependent. Yet, the frequency of Pb heterozygotes in wild populations appears high.  
210 Zygosity dependent ( $Pb/pb$  or  $Pb/Pb$ ), and specific to individual zones of regulation with  
211 variability; Pb causes a large reduction on yellow color pigment populations (*xanthophores*).  
212 It thus produces a modified purplish-pink expression instead of the orange color pigment  
213 (*xantho-erythrophores*). By nature, yellow color pigment in Guppies is highly motile and  
214 mood dependent while red color pigment is non-motile. While red color pigment  
215 (*erythrophores*) is not altered, or at least altered to a lesser degree, a corresponding  
216 noticeable increase in the visibility (possibly increased population levels) of structural violet-  
217 blue iridophores is evident, resulting in the increased reflective qualities of individuals.

218 When not masked by additional color and/or pattern traits, the identification of Purple  
219 Body (*Pb*) in both wild-type and domestic males can be easily accomplished through visual  
220 phenotypic observation. In non-Purple Body ( $pb/pb$ ) the individual's carotenoid orange  
221 color pigment can be described as being vivid bright orange, structurally comprised of

222 densely packed yellow and orange xantho-erythrophores, normally extending to the very  
223 edge of the spot. Though coverage over additional iridophore patterns may appear  
224 incomplete.

225 Heterozygous Purple Body (*Pb/pb*) males express modified purplish-pink spots under  
226 early morning and late afternoon ambient sunlight. This same coloration can be easily  
227 observed under hand held incandescent lighting focused toward the side of the tank. During  
228 periods of midday sunlight or under overhead artificial light sources *Pb* may appear as dark  
229 or faded orange.

230 A reduction in the number of yellow xanthophores results in a corresponding reduction in  
231 overall size of individual spotting ornaments. This reveals a “circular ring” produced by an  
232 underlying iridophore layer. This well-defined layer of iridophores is the actual underlying  
233 precursor required for definition of shape over which color pigment cells populate. In  
234 general, spectral observation and photography of guppies from crosses reveal iridophore  
235 migration and pattern formation prior to the formation of xantho-erythrophores. Microscopy  
236 reveals minimal xantho-erythrophore populations to be already in place at first (*Bias and*  
237 *Squire, 2017b, Pb Microscopy Study forthcoming*). It has been suggested that, “it is crucial  
238 to consider iridophores as well, which might attract melanophores and xanthophores to the  
239 locations where spots arise during male color pattern formation. Depending on the location,  
240 iridophores might also repulse xanthophores or melanophores, or influence their survival”  
241 (Kottler 2014). Our findings concur with this suggestion. As will be further discussed in the  
242 results, Purple Body has shown an incompletely dominant mode of inheritance. In  
243 heterozygous condition (*Pb/pb*) a distinct result is generated while in homozygous condition  
244 (*Pb/Pb*) these results are further amplified.

245 Heterozygous *Pb* in both wild-type and domestic individuals alters orange spots in select  
246 regions of the body and in finnage to “purplish-pink”. Thus, it may not act as a “full body”  
247 modifier in heterozygous form. Heterozygous *Pb* does not appear to greatly reduce visible  
248 structural yellow color pigment cells over white leucophore or reflective clustered yellow  
249 cells, known in breeder circles as Metal Gold (*Mg*) (*Undescribed - see Bias 2015*), in body  
250 and finnage. A slight increase in visibility of violet-blue iridophores is often detected.  
251 Additionally noted is an increase and modification in existing melanophore structure and  
252 populations.

253 Homozygous *Pb* in both wild-type and domestic individuals alters all orange spots found  
254 in the body and in finnage to “purplish-pink”. Thus, *Pb* should be considered a “full body”  
255 modifier. Homozygous *Pb* produces a purple guppy phenotype. Homozygous *Pb* removes  
256 all visible yellow color pigment over white leucophore, but not *Mg* in body and finnage. This  
257 in turn, produces a dramatic increase in the visibility of wild-type violet-blue iridophores. A  
258 dramatic increase and modification in existing melanophore structure and populations is  
259 noted. Provided are examples (**Fig 3-4**) of Phenotypic distinction between *Pb* and non-*Pb*  
260 in wild Guppy populations. For examples in Domestic strains see *Bias and Squire 2017c,*  
261 *forthcoming*.

262

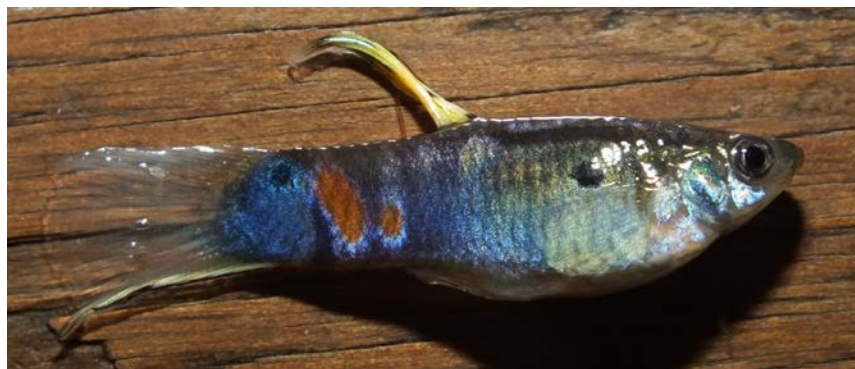

263  
264

**Fig 3.** Homozygous *Pb*.

265

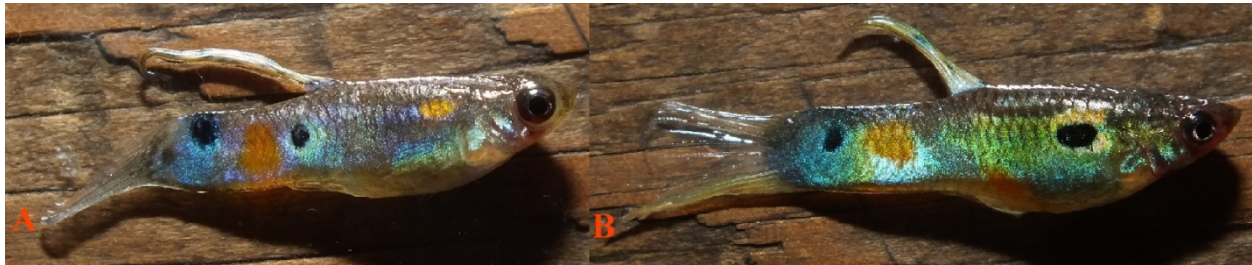

266

267

268

**Fig 4. (A)** Heterozygous Pb (left), **(B)** Non-Pb male (right).

269

## Description and Characteristics: cellular expression of Pb

270

### vs. non-Pb

271

272

273

274

275

276

277

278

279

In general, while there are microscopic differences, our findings of visual distinctions between Pb and non-Pb are often more consistent, as opposed to microscopic distinctions. Much of this is likely the result of variability in both zygosity and ornament composition between individuals, both among and between populations and strains. Microscopically, structural differentiation between xantho-erythrophores appears minimal, with differences in population levels and collection or clustering of xanthophores. Heterozygous Pb exhibits partial reduction in collected xanthophores, and homozygous Pb exhibits near complete removal of collected and clustered xanthophores. Though, it is noted yellow color cell populations consisting of isolated “wild-type” single cell xanthophores remain intact.

280

281

282

283

284

285

286

287

288

289

290

291

292

293

294

Dendritic melanophores are present in both Pb and non-Pb at various locations in the body. Observation of Pb in heterozygous and homozygous condition, for mature individuals, reveals that ectopic melanophore dendrites are often extremely extended (**Fig 5**). This occurs either as the result of direct modification by Pb, or indirectly through interactions as a result of xanthophore reductions or removal (Kottler, 2015). Overall dendritic melanophore structure is of a much “finer” appearance as compared to non-Pb. Modified melanophores are more often linked together in “chain-like” strings (**Fig 5**), as compared to non-Pb, both within and outside of areas defined as reticulation along scale edges. While this study did not directly seek to identify an increase in melanophore populations, it was assumed higher numbers of melanophore structures would be present in Pb. While this may be the case, “darker” appearance in Pb vs. non-Pb appears to largely be the result of modification of existing melanophore structures (corolla and punctate) into extended dendrites. Thus, the number of melanophore structures does not appear to drastically increase, in any given individual, only the size of the structures themselves.

295

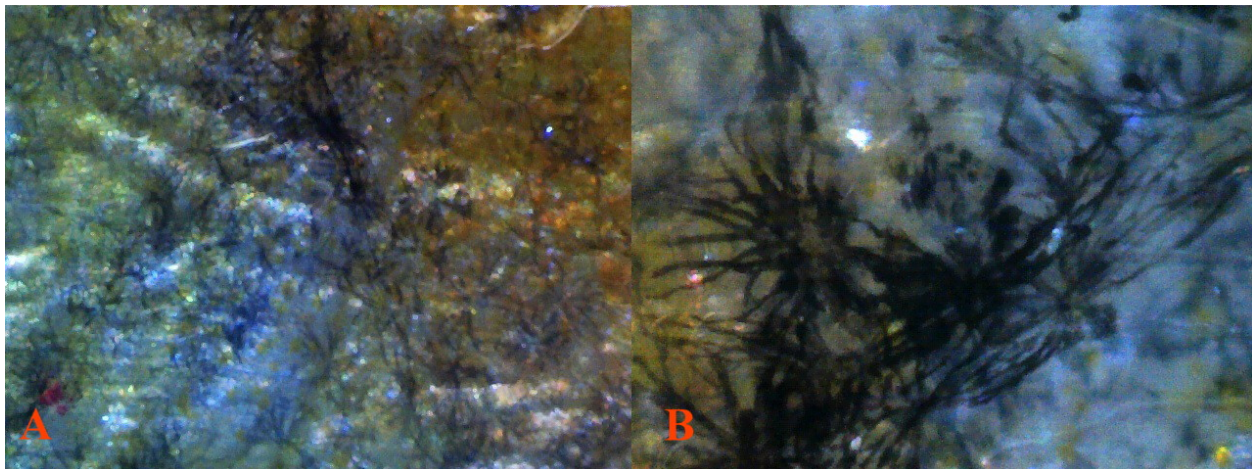

296 **Fig 5. (A)** 8 Pb 40X 11 under reflected light without transmitted light (*dissected*). **(B)** 8 Pb  
297 100X 12 under reflected light without transmitted light (*dissected*). Pb modified dendritic  
298 melanophore strings and violet-blue iridophore chromatophore units along scale edging  
299 producing reticulated pattern. The extreme “length” of dendrites is a result of Pb.  
300

301 The motile nature of melanosomes in ectopic melanophores may allow for changes in  
302 reflective qualities or hue of individuals. In conjunction with zygoty dependent removal of  
303 xantho-erythrophores, this may satisfy both female sexual selective preferences for  
304 conspicuous pattern of “bright orange” under specific lighting, and maintain crypsis in  
305 others (Endler 1978). While frequent evidence of dendritic and/or motile yellow color  
306 pigment (xanthophore) structures was detected in this study, none was found for dendritic  
307 and/or motile iridophores, outside of violet and blue [*hereafter violet-blue*] iridophore  
308 clustering associated with ectopic dendritic melanophores. Violet-blue iridophores are more  
309 visible in Pb vs. non-Pb, with variability between populations and strains, based on overall  
310 genotype. Specific to varying genotypes of individuals, there appears to be an actual  
311 increase in the ratio of violet to blue iridophores, as would be expected in an “all purple  
312 phenotype”. Whether there is an actual increase in iridophore population numbers, or  
313 simply increase visibility, due to reductions or removal of xanthophores and/or altered  
314 melanophores was not addressed in this study. Nor was the issue of the modification of the  
315 angles at which crystalline platelets reside beneath iridophore layers and basal level  
316 melanophores.  
317

### 318 **Cellular Comparison: Ocular Media Pb and non-Pb**

319 Our study revealed that all major classes of chromatophores (melanophores,  
320 xanthophores, erythrophores, and violet-blue iridophores) and crystalline platelets were  
321 present in the cornea, aqueous humor, vitreous humor, outer lens membrane and possibly  
322 the lens itself of *Poecilia reticulata*. Contrary to visual observations and conventional  
323 transmitted light microscopy the cornea, aqueous and vitreous humor are not clear under  
324 conventional reflected light microscopy. Each possesses independent populations of static  
325 and/or free-floating chromatophores. To the authors’ knowledge this is the first time this  
326 has been reported in *P. reticulata*.

327 We postulate that dense layers of violet-blue iridophores in conjunction with  
328 melanophores and xanthophores residing within the cornea-aqueous humor (**Fig 6**)-iris-  
329 vitreous humor and the surrounding capsule at the anterior pole of the crystalline lens act  
330 as “ocular media filters”, with individuals deriving benefit in the UV and/or near-UV  
331 spectrum. Pb will provide benefit at lower wavelengths with increased levels of violet  
332 iridophores, and non-Pb will have reduced benefit at slightly higher average wavelengths  
333 with balanced violet-blue iridophores. In turn, xanthophores counter balance and provide  
334 benefit in the higher wavelengths. [**Note:** For complete ocular microscopy study, see Bias  
335 and Squire 2017c, *forthcoming*.]  
336

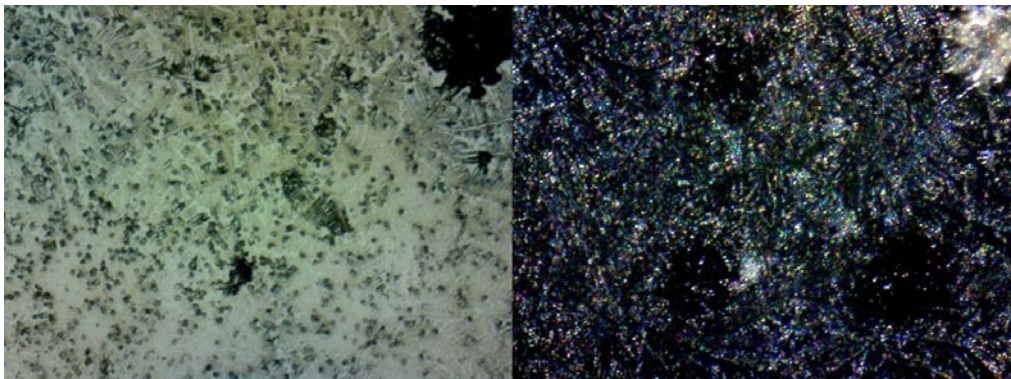

337



338 **Fig 6.** Wet mounts, no cover glass, dehydrated. Aqueous humor fluid extraction **(A)** 32 40  
339 8 *Pb/-* (*dissection*) transmitted light. **(B)** The same field reflected light with white balance  
340 adjusted.

341

## 342 **Cellular Comparison: melanophore modifications in *Pb*** 343 ***Pb/pb* vs. non-*Pb pb/pb* under reflected and transmitted** 344 **light**

345 Dendritic melanophores in heterozygous and homozygous *Pb* condition, in mature  
346 individuals, reveal that dendritic arm structure is extremely extended and finer in  
347 appearance **(Fig 7)**. Dendrites are linked together in "chain-like" strings intermingled with  
348 violet-blue iridophores in chromatophores units. Within the rear peduncle spot and  
349 surrounding edges a noticeable absence of corolla and punctate melanophores was often  
350 evident. This absence was abated in other regions **(Fig 8)** of the body or specific to  
351 individuals. The angle of incident lighting and spectral capabilities can alter visual  
352 perception, so too can the direction of light. Examples are here presented under both  
353 reflected and transmitted lighting, to reveal chromatophore visibility and expression for  
354 each.

355

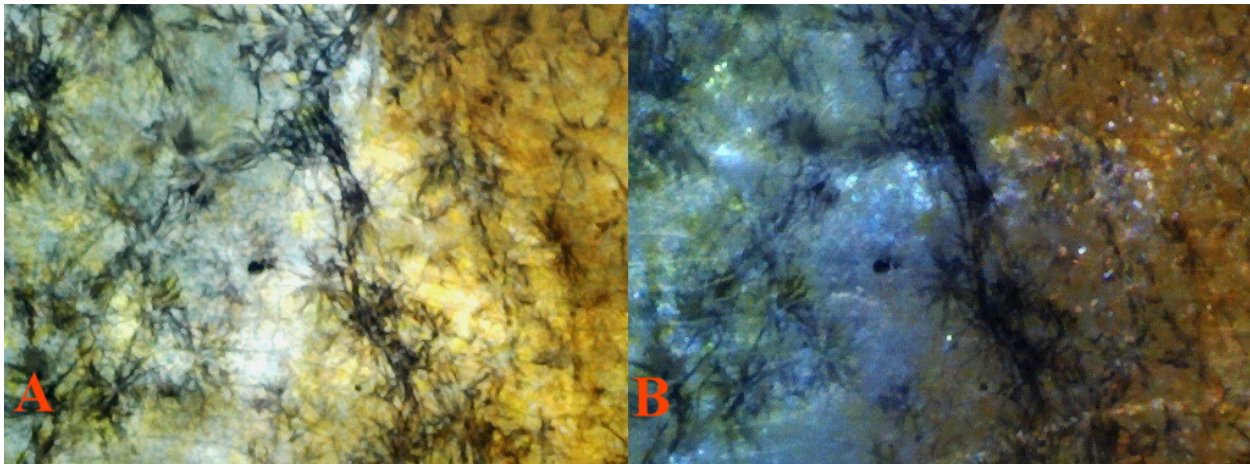

356 **Fig 7. (A)** 8 *Pb* 40X 13 *Pb/pb* (*dissected*) transmitted light. **(B)** The same field, reflected  
357 light. Extreme dendritic melanophore modification in reticulated pattern do to heterozygous  
358 *Pb*.

359

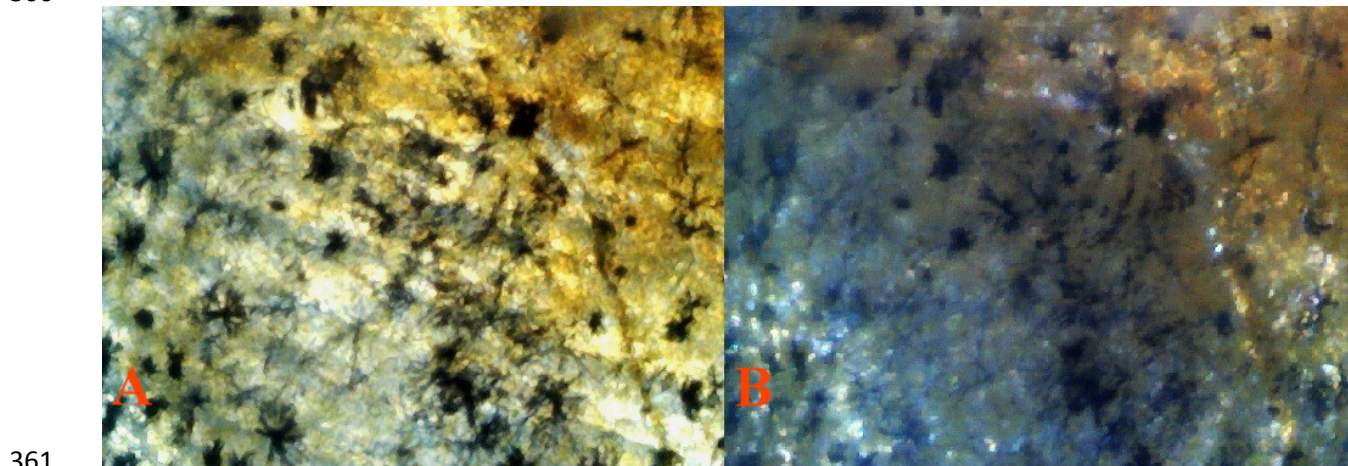

361

362 **Fig 8. (A)** 7 non-Pb 40X 15 *pb/pb* (*dissected*) transmitted light. **(B)** The same field,  
363 reflected light. Reduced dendritic melaophore extensions in non-Pb.  
364

### 365 **Cellular Comparison: early coloration in Pb *Pb/pb* vs. non-** 366 ***Pb pb/pb* male Guppies (*Poecilia reticulata*)**

367 The following examples of early coloration in non-Pb and Pb show male expression of  
368 violet-blue iridophores macroscopically (**Fig 9**) 100x. Visual distinction is easily made  
369 between the two iridophore types. Changes in magnification, progressive focal shift,  
370 adjustment in angle of incident lighting or direction of light (reflected or transmitted)  
371 consistently failed to remove this visible distinction between violet and blue. Thus, this  
372 demonstrates two distinct iridophore populations in the blue-violet spectrum.

373 Two distinct observations are offered based on early coloration. First, violet and blue  
374 iridophores appear “randomly collected among themselves” in similar fashion (**Fig 9**), as  
375 opposed to later mature coloration in which violet and blue iridophores are arranged  
376 together in “joined alternating color” groupings in dissimilar fashion. This shows that  
377 coloration is nearly complete, while migration to their final location is not. Second,  
378 melanophore shape is predominately corolla or punctate in early coloration (**Fig 9**), as  
379 opposed to mature coloration in which dendrites dominate. This indicates that members of  
380 the melanophore population are in place, while their final shape is not established. Side by  
381 side presentation of similar locations in Pb and non-Pb are presented.  
382

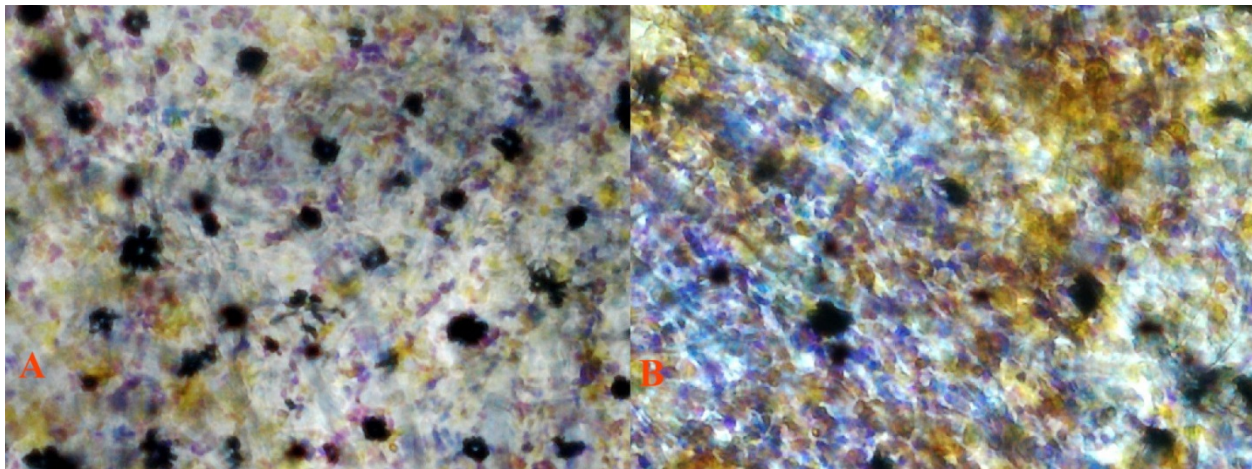

383 **Fig 9. (A)** 6 Pb 100X 12 *Pb/pb* (*dissected*) transmitted light. More violet iridophores than  
384 blue iridophores. **(B)** 3 non-Pb 100X 14 *pb/pb* (*dissected*) transmitted light. More evenly  
385 distributed blend of violet and blue iridophores in non-Pb as compared to Pb.  
386  
387

### 388 **Cellular Comparison: late coloration in Pb *Pb/pb* vs. non-** 389 ***Pb pb/pb* male Guppies (*Poecilia reticulata*)**

390 Macroscopically (**Fig 10**) and microscopically (**Fig 11**) visible in heterozygous Pb are  
391 partial reductions in collected xanthophores, and in homozygous Pb near complete removal  
392 of collected and clustered xanthophores. Yellow color cell populations consisting of isolated  
393 “wild-type” single cell xanthophores remain intact.

394 All major classes of chromatophores were present in the rear peduncle spot and  
395 adjoining areas in both Pb and non-Pb. Violet-blue iridophores are more visible in Pb (**Fig**  
396 **10A**) vs. non-Pb (**Fig10B**), with variability between study specimens. An increase in the  
397 ratio of violet to blue iridophores was observed. Collected and clustered xanthophore  
398 populations, found in non-Pb (**Fig 11B**) members of the contemporary group, were reduced  
399 in heterozygous Pb (**Fig 11A**) condition and removed in homozygous Pb condition. The

400 retention of isolated xanthophores remained intact in both heterozygous and homozygous  
401 Pb condition.  
402

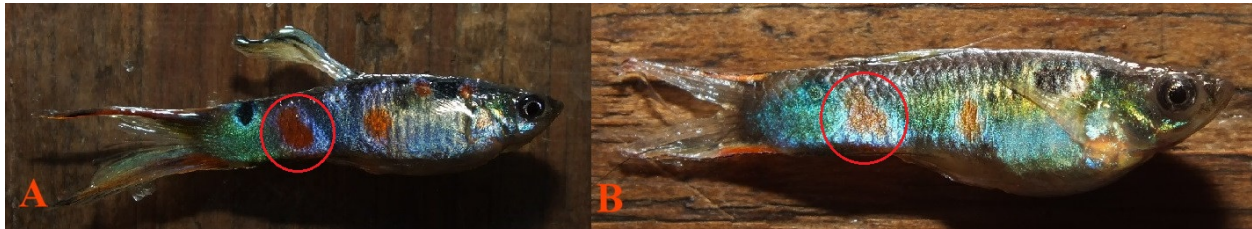

403  
404 **Fig 10. (A)** Heterozygous 11 Pb male *Pb/pb*, **(B)** 6 non-Pb male *pb/pb*. All slide images  
405 taken from posterior orange spot (red circle).  
406

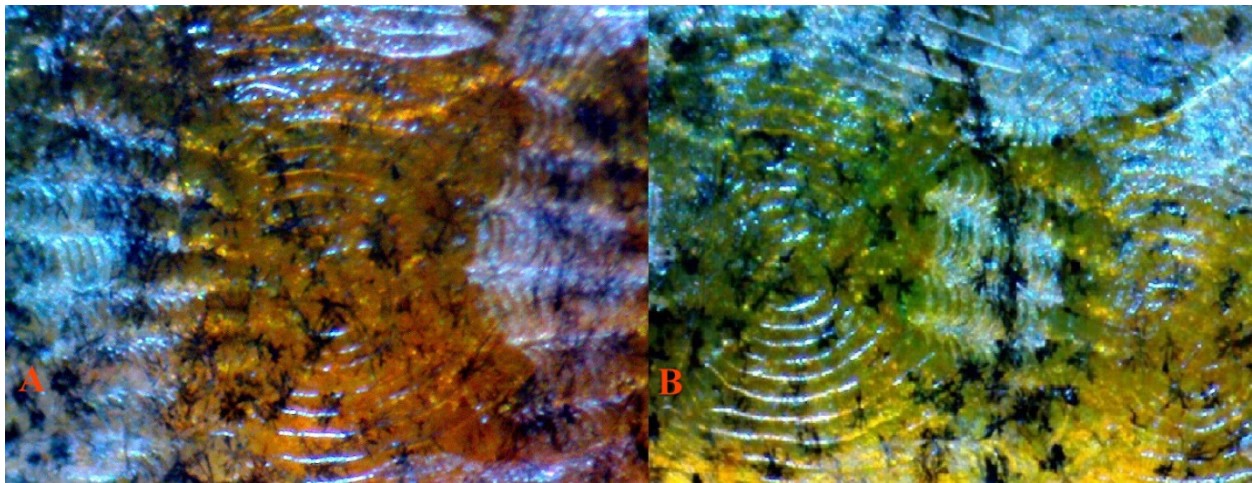

407  
408 **Fig 11. (A)** 13 Pb 40X 4 *Pb/Pb* (dissected) reflected light. Expected higher visibility of  
409 erythrophores with reduction of xanthophores by Pb modification. **(B)** 14 non-Pb 40X 3  
410 *pb/pb* (dissected) reflected light. Expected evenly distributed xantho-erythrophores in non-  
411 Pb.  
412

### 413 **Cellular Comparison: late coloration in Asian Blau *Ab/ab*** 414 ***Pb/Pb* vs. non-Pb *Ab/ab pb/pb* male Guppies (*Poecilia*** 415 ***reticulata*)**

416 Asian Blau (*Ab* – *undescribed*, see Bias 2015) presents a unique opportunity to further  
417 confirm the spectral removal of yellow color pigment by Pb, though microscopic study  
418 reveals this removal to be far from complete. Autosomal incompletely dominant *Ab*, as  
419 opposed to autosomal recessive European Blau (*r* or *r1*, Dzwillo 1959) in heterozygous and  
420 homozygous condition removes red color pigment (**Fig 12-14**).

421 Collected yellow color pigment and clustered Metal Gold (*Mg* - *undescribed*, see Bias  
422 2015) xanthophores are little affected by this erythrophore defect (**Fig 12B**), as shown in  
423 the *pb/pb Ab/ab* male. The following macroscopic photo clearly reveals near complete  
424 removal of densely packed collected yellow cells in the *Pb/Pb Ab/ab* (**Fig 12A**) male,  
425 leaving an underlying “circular ring” of violet-blue iridophores intact. As previously noted,  
426 Pb in itself has little or no effect on erythrophore populations. Albeit, Pb modification results  
427 in increased expression of violet iridophores (**Fig 12A vs. 12B**).

428 The macroscopic presence of underlying iridophores, lacking a xantho-erythrophore  
429 (yellow-orange) overlay in *Pb/Pb Ab/ab* (**Fig 12A**) and lacking erythrophore (orange) overly  
430 in non-Pb *pb/pb Ab/ab* (**Fig 12B**), allows for the visual distinction between xantho-  
431 erythrophore populations. Though structural differences between xanthophores and

432 erythrophores may be limited to variability in placement of underlying reflective crystalline  
433 platelets (Kottler 2014).  
434

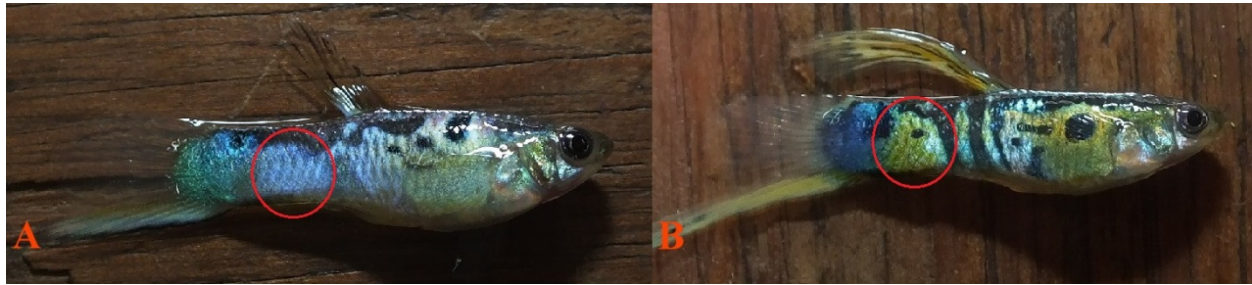

435  
436 **Fig 12. (A)** 5 Pb male (grey) *Pb/Pb Ab/ab*, **(B)** 4 non-Pb male (grey) *pb/pb Ab/ab*. All slide  
437 images taken from posterior modified orange spot (red circle).  
438

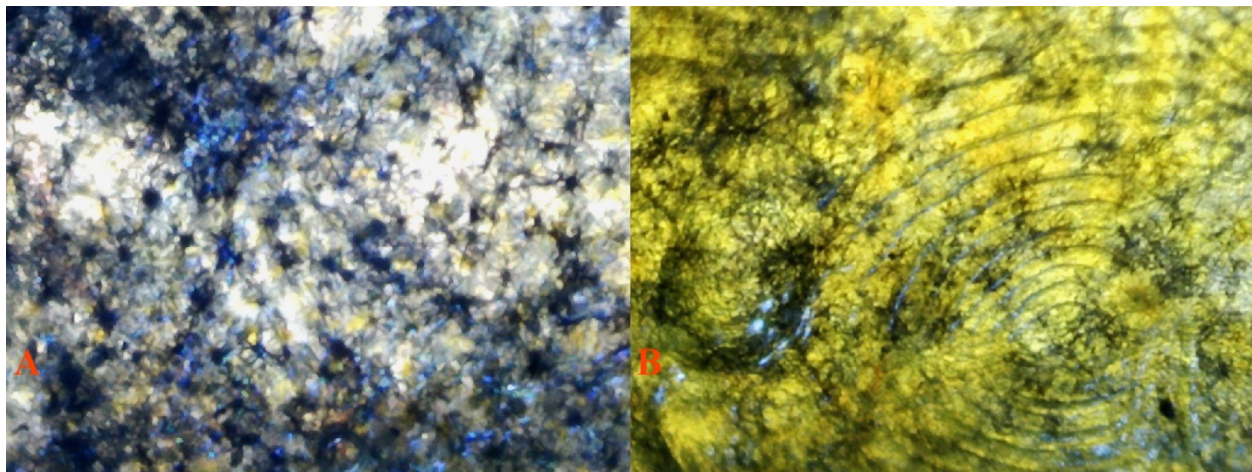

439  
440 **Fig 13. (A)** 5 Pb 40X 16 *Pb/Pb Ab/ab* (dissected) reflected/transmitted light. Underlying  
441 violet-blue iridophore structure is clearly revealed in absence of collected xantho-  
442 erythrophores. **(B)** 4 non-Pb 40X 8 *pb/pb Ab/ab* (dissected) reflected/transmitted light.  
443 Collected xanthophores masking violet-blue iridophores in absence of erythrophores.  
444

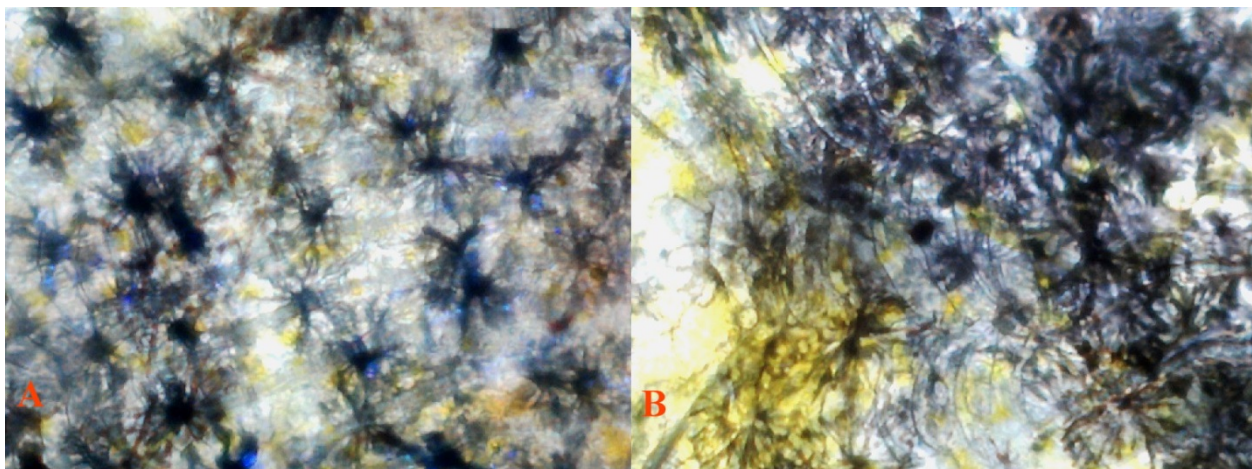

445  
446 **Fig 14. (A)** 5 Pb 100X 1 *Pb/Pb Ab/ab* (dissected) reflected/transmitted light. Dendritic  
447 melanophore modification by homozygous Pb. Composition of dendritic melanophore-  
448 iridophore chromatophore units visible. **(B)** 4 non-Pb 100X 9 *pb/pb Ab/ab* (dissected)

449 reflected/transmitted light. Collected xanthophores masking violet-blue iridophores in  
450 absence of erythrophores.

451

452 **Note:** For complete cellular microscopy study, see Bias and Squire 2017b, *forthcoming*.

453

## 454 **Materials**

455 Strain ID, Breeding Strain, Description and Source (**See:** Supplemental S3 for full details).

456

457 A. Roebuck IFGA Purple Delta.

458 B. Shubel IFGA Green Delta.

459 C. Bias Ginga Sulphureus.

460 D. Bias Panda Moscow.

461 E. Bias Vienna Lower Swordtail (*Ls*).

462 F. Magoschitz Vienna Emerald Green Double sword (*Ds*).

463 G. Bias Red Double sword (*Ds*).

464 H. Mosseau IFGA Purple Delta.

465 I. Mosseau IFGA Green Delta.

466 J. Anderson IFGA Green Delta.

467 K. Anderson IFGA Purple Delta.

468 L. Feral Pingtung (*P. reticulata* Pingtung, Taiwan BG-2016).

469 M. Feral Warm Spring (*P. reticulata* Kelly Warm Springs, ID TG-2016).

470 N. Feral Jemez (*P. reticulata* McCauley Springs, NM TG-2016)

471

## 472 **Methods**

473 Broods were raised in 5.75, 8.75 and 10-gallon all-glass aquaria dependent upon age.  
474 They received 16 hours of light and 8 hours of darkness per day. Fish were fed a blend of  
475 commercially available vegetable and algae based flake foods and Ziegler Finfish Starter  
476 (50/50 mix ratio) twice daily, and newly hatched live *Artemia nauplii* twice daily. A high  
477 volume feeding schedule was maintained in an attempt to produce two positive results: 1.  
478 Reduce the time to onset of initial sexual maturity and coloration, and thus reduce time  
479 between breeding's. 2. Increase mature size for ease of phenotypic evaluation and related  
480 microscopic study.

481 Temperatures ranged from 78°F to 82°F. Virgin females were used in all crosses. Virgin  
482 females were obtained by removing all females from the brood tanks by "gravid spot  
483 selection" prior to male anal fins changing into gonopodia. Crosses involved breeding groups  
484 of single males (unknown or assumed genotype) or 2-3 males (known genotype) and 1-6  
485 females. Pregnant females were isolated in breeding nets for collection of fry, and returned  
486 to breeding groups once they had produced young. All broods from each female were  
487 transferred to individual tanks and reared independently. Thus the genotypes of parental  
488 sires and dams could be verified with analyses.

489

## 490 **Results**

491 A series of well-defined and structured breeding tests were undertaken during a period  
492 starting in March 2014, and ending in July 2016 upon phenotypic evaluation of final results.  
493 Efforts were made to encompass both feral populations and Domestic Guppy strains in this  
494 study.

495 The use of both wild-type and Domestic strains serves a twofold purpose. First, various  
496 zygosity-dependent expressions of Pb can be identified in males of either type. Second, this  
497 allows for the evaluation of natural expression of Pb modified color pigment and iridophores  
498 in Domestic females. The latter not being possible in color / tail neutral wild-type females.

499 Wild-type female guppies offer little in the way of visible phenotypic expression of  
 500 structural color pigments. While female expression of iridophores is easily noted, this too  
 501 can vary greatly between populations and strains.

502 The evaluation of color and tail neutral females in wild-type is limited to evaluation of  
 503 increased violet-blue iridophores along the anterior lateral line. While reliable to a high  
 504 degree in homozygous *Pb* specimens, this has not proven a reliable tool for evaluation in  
 505 heterozygous *Pb* females.

506 In **Fig 15**, a pure bred male with a non-purple body was crossed to a pure bred female  
 507 which was all-purple. The  $F_1$  were 100% Purple Body, but they were not all-purple. It should  
 508 be mentioned here that all  $F_1$  and later generation males had some green coloration  
 509 whether or not they had Purple Bodies. Therefore Purple Body is due to a dominant gene,  
 510 and the all-purple phenotype involves an additional genetic component that is not dominant.  
 511 It does not eliminate green coloration. Since green color is produced by light rays reflected  
 512 from blue iridophores and then passing through yellow xanthophores, this shows that some  
 513 xanthophores do remain.

514

**P<sub>1</sub> pure breeding non-Purple body -X- pure breeding Purple Body (Breeding No. 5)**

**Bias Panda Moscow male**

**Roebuck all-Purple delta female**

*pb/pb* or

*Pb/Pb* or

*Xpb Y*

*XPb XPb*

519

**F<sub>1</sub> Results**

520 15 Purple Body males

*Pb/pb* or *XPb Y*

521 10 Purple Body females

*Pb/pb* or *XPb Xpb*

522

523

524

**F<sub>1</sub> Purple Body male -X- F<sub>1</sub> Purple Body female (Breeding No. 7)**

*Pb/pb* or

*Pb/pb* or

*XPb Y*

*XPb Xpb*

527

528

**F<sub>2</sub> Results**

529 5 Purple Body males

*Pb/-* or *XPb Y*

530 5 non-Purple Body males

*pb/pb* or *Xpb Y*

531 11 Purple Body females

*Pb/-* or *XPb*

532 3 non-Purple Body females

*pb/pb* or *Xpb Xpb*

533

534

**Test cross:**

**pure breeding non-Purple Body -X- F<sub>1</sub> Purple Body female (Breeding No. 6)**

**Bias Panda Moscow male**

*pb/pb* or

*Pb/pb* or

*Xpb Y*

*XPb Xpb*

538

539

540

**TC<sub>1</sub> Results**

541 12 Purple Body males

*Pb/pb* or *XPb Y*

542 7 non-Purple Body males

*pb/pb* or *Xpb Y*

543

544

Females not scored

545 **Fig 15.** Since the P1 female had a Purple Body, Purple Body was not located on the Y-  
 546 chromosome. The  $F_1$  and  $TC_1$  show that Purple Body/non-purple body is dominant and not  
 547 Y-linked. The  $F_1$ ,  $F_2$  and  $TC_1$  show that Purple Body could be either X-linked or autosomal.  
 548 Possible genotypes are shown.

549

550 We can eliminate incomplete dominance as an explanation with all-purple being due to  
 551 a homozygous genotype and Purple Body the heterozygote with non-purple body the

552 homozygous recessive, because homozygous Purple Body fish in the Bias Vienna Lower  
553 Swordtail strain do not have all-purple bodies. They have green as well as purple. Since the  
554 F<sub>1</sub> males were Purple Body rather than non-purple body, Purple Body/non-purple body is not  
555 Y-linked. However these results did not distinguish between the possibilities that Purple  
556 Body is X-linked or autosomal.

557 In **Fig 16**, different F<sub>1</sub> Purple Body males were crossed to pure bred non-purple body  
558 females in a test cross. The combined F<sub>1</sub> ratios from several litters were 37 Purple Body: 38  
559 non-purple body. This near perfect 1:1 ratio is expected with an autosomal dominant gene  
560 for Purple Body. In order for Purple Body to be sex-linked, the recombination frequency  
561 would have to be 50%. Although this is theoretically possible for genes located in the  
562 pseudo-autosomal region of a sex determining chromosome, it may not be likely here.

563

564 **P<sub>1</sub> heterozygous Purple Body -X- pure breeding non-Purple Body (Breeding Nos.**  
565 **12, 13, 14)**

566 **Bias Vienna LS**

567 *Pb/pb* or  
568 *XPb Y*

567 **Magoschitz Vienna green DS**

568 *pb/pb* or  
569 *Xpb Xpb*

569

570

571 **F<sub>1</sub> Results**

572 27 Purple Body males *Pb/pb*

573 26 non-Purple Body males *pb/pb*

574 Females were not scored

575

576 **P<sub>1</sub> heterozygous Purple Body -X- pure breeding non-Purple Body (Breeding Nos.**  
577 **10, 11)**

578 **Bias Vienna LS male**

579 *Pb/pb* or  
580 *XPb Y*

578 **Mousseau green delta female**

579 *pb/pb* or  
580 *Xpb Xpb*

581

582 **F<sub>1</sub> Results**

583 10 Purple Body males *Pb/pb*

584 12 non-Purple males *pb/pb*

585 5 Purple Body females *Pb/pb*

586 3 non-Purple females *pb/pb*

587 9 Unknown females *??/??*

588

589 **Fig 16.** These two crosses eliminate the possibility that Purple Body is X-linked. If it were X-  
590 linked, then all F<sub>1</sub> males should be non-purple body. The combined ratio of 37 Purple Body:  
591 38 non-purple body is a near perfect 1:1 ratio, as expected if Purple Body is due to an  
592 autosomal dominant gene. Additionally, if *Pb* were X-linked, then all F<sub>1</sub> females should be  
593 Purple Body, but instead we obtained 5 Purple Body females and 3 non-purple body females  
594 in the second cross. Therefore *Pb* is located on an autosome.

594

595 According to Tripathi et al. (2009), X-Y recombination is repressed (but not completely  
596 eliminated) in the pseudoautosomal region of guppies. For an additional discussion of the  
597 implications of sex chromosome structure in the guppy, see Nanda et al (2014). However,  
598 Lisachov et al. (2015) concluded that the low frequency of recombination observed by  
599 Tripathi et al. may have been due to a lack of informative markers. Lisachov et al reported a  
600 chiasma frequency of 83% of in the distal region of the sex chromosomes and suggest a  
601 "free combining region" at that end.

602 They compare their model of sex chromosome structure containing two "free  
603 recombining regions" on the sex chromosomes with the model of Tripathi et al and others  
604 that had one such region. All authors agree that there is a low recombination frequency in

605 the pseudoautosomal region previously described, but Lisachov et al basically propose two  
606 pseudoautosomal regions which they call “free recombining regions”.

607 If Purple Body is located on the sex chromosomes, then in **Fig 16** we see 37 out of 75  
608 recombinants and a recombination frequency of 49.3%. A chiasma frequency of 83%  
609 suggests a maximum recombination frequency of up to 41.5%. While a sample size of  
610 “only” 75 males is too small to reject the location of Purple Body on the sex chromosomes,  
611 an autosomal location seems more likely. We realize that a very large sample size would be  
612 needed to completely eliminate (or affirm) the sex chromosomal location of Purple Body.  
613 But the autosomal location of Purple Body is the most likely conclusion.

614

615 **Note:** For full description of all test breeding’s, parental and offspring photos see  
616 supplementary appendices: **S1 TABLE** – Condensed Breedings and Results and **S2 TABLE**  
617 – Expanded Breedings and Results, with photographs of examples of all fish.

618

## 619 Discussion

### 620 Purple Gene Overlooked in Previous Studies

621 Further study in the field should show that Pb is an integral part of wild *P. reticulata*  
622 populations, not the result of periodic population admixture through introductions. In many  
623 localized populations, especially feral ones, Purple Body phenotypic frequency may be more  
624 prevalent than non-Purple Body. It has been proposed that when a species encounters  
625 novel environmental conditions, they may adapt differently from native locales (Grether  
626 2005). Though, general observations of *P. reticulata* *wingei* (*Cumana* *Guppy*) collection  
627 and study (*Fig. 3a*, Alexander and Breden 2004) suggest exclusivity of non-Pb in core area  
628 populations and predominance of Pb in overlapping areas of variant hybridization (*Fig. 3b*,  
629 Alexander and Breden 2004). This was likely biased by sexual selection preferences and  
630 compounded by environmental conditions. Thus, non-Pb is the suggested “norm” in *P. r.*  
631 *wingei*, while a Pb polymorphism is the “norm” in *P. r. reticulata*, with many Pb/pb  
632 heterozygotes.

633 Variation in predator and/or prey spectral sensitivities was early suggested as indicative  
634 of ornamentation appearing different under distinct time and space constraints (Endler  
635 1991). While male Pb may be beneficial under specific lighting conditions as a result of  
636 female sexual selective preference, obvious questions arise. Is crypsis maintained in the  
637 presence of predators? Is Pb modification in itself an antipredator adaptation? A high  
638 incidence of Purple Body modification is noted from previously presented photographic  
639 exhibits of study specimens: (*Plate II Fig A and Plate IV*, Haskins 1970; *Figure 7*, Endler  
640 1978; *Figure 5a*, Schröder 1983; *Figure 1*, Brooks 2002; *Figure 1* Olendorf 2006; *Figure 3*,  
641 Kemp 2008 and 2009; *Figure 2(b)* Pb Aripo River male, Millar 2012; *Figure 2*, Jourdan  
642 2014; Pb modified “Marianne” males M14 (HP) and M16 (LP) on left, *Figure 3*, Gotanda  
643 2014, Pb modified males “Guppy colour diversity within and between sites – five males from  
644 a given site”, Hendry Labs online 2015). Yet, the presence of the Purple Gene, and resultant  
645 implications on reduction of overall orange areas through the reduction and/or removal of  
646 xanthophores, is most often documented under “reduced expression of orange area” or  
647 “ambient light variation in hue reflection”.

648

### 649 Opsin and UV

650 Spectral color is produced by single wavelengths of ambient sunlight. The Visible Wave  
651 Length (Perceived Color) includes: red (620-670 nm Bright Red / 670-750 nm Dark Red),  
652 orange and yellow (570-620 nm), green (500-570 nm), blue (430-500 nm), indigo (often  
653 omitted in modern times) and violet (400-430 nm). Red light, with the longest wavelength  
654 and the least amount of energy, allows natural light penetration at less depth. Blue / violet  
655 light (*near-UV*), has the shortest wavelength and the most amount of energy, and allows



656 natural light penetration at deeper depth. Violet is a true wavelength color. While Purple is  
657 a composite effect produced by combining blue and red wavelength colors.

658 Any visible light that penetrates the surface of a body of water is refracted; light travels  
659 slower in water vs. air. At the surface approximately one-third of surface light is scattered  
660 and absorbed by water under optimum conditions. At 1 meter up to two-thirds of the  
661 surface light spectrum is absorbed. Beyond this depth absorption has little impact on  
662 Guppy color study as it is beyond the zone of habitation. Environmental conditions of  
663 natural Guppy habitat are varied and under diverse lighting conditions. At mid-day nearly  
664 all light may be absorbed by water, and little is reflected. While in the early morning and  
665 late afternoon a reduction of absorbed light is seen, and more is reflected. Absorption of  
666 both sunlight, and its energy, may be further reduced by cloud cover, plant cover, time of  
667 day, time of year, altitude, water molecule structure, water flow, and turbidity.

668 With such a broad range of spectral irradiance, it is only natural that study of Guppies  
669 would evolve with consideration of visual capabilities extending from near-UV to far red.  
670 Vision is based on retinal (forms of Vitamin-A) bound to opsin proteins. Visual receptor cells  
671 in Guppies contain light sensitive opsins along outer segments. Opsin "pigment pairs"  
672 contain two pigments with different wavelength peak sensitivity; one rhodopsin (also known  
673 as visual purple) and one porphyropsin (Bowmaker 1990). *Poecilia reticulata* possess at  
674 least six (see later study indicating nine) long-wavelength sensitive (*LWS*) opsins, as  
675 compared to other teleost species averaging two. Study has shown that *reticulata* opsin  
676 divergence occurred both pre and post divergence from a close related species, *Lucania*  
677 *goodei* (Weadick 2007). Results favoring four out of six opsin duplication events occurring  
678 after divergence, likely playing a role in *P. reticulata* extreme polymorphic diversity in  
679 comparison to *L. goodei*.

680 Variation in colors and color characteristics such as hue, depth, etc. cannot be important  
681 in female based sexual selection unless the female can detect these color characteristics.  
682 Therefore the evolution of color characteristics must be accompanied by the evolution of the  
683 ability to detect the colors. Endler showed that selection for spectral sensitivity variation in  
684 both short-wavelength sensitivity (*SWS*) and long wave sensitivity (*LWS*) is due to an  
685 heritable factor (Endler 2001). Recent study indicates color vision varies across  
686 populations, and that populations with stronger preferences for orange had higher *LWS*  
687 opsin levels (Sandkam 2015a and 2015b). It has been shown that Guppies are able to  
688 perceive UV wavelengths, and that males reflect UV from both structural color and color  
689 pigment with variability between individuals. It was further shown that female association  
690 preference with males is under long wavelength (*UV-A*) conditions in which orange is visible  
691 (White 2003). While this study was suggestive of females having little or no sexual  
692 selection preference for either low UV or high UV males, it did not specifically focus on  
693 benefit derived from reflective qualities of Pb under reduced ambient lighting conditions.

694 Further Opsin studies of *Poecilia wingei*; i.e. the Cumana' Guppy, reveal that gene  
695 duplications have increased the number of opsin genes and one additional opsin gene (*LWS*  
696 *A180*) is the result of divergence from an ancestral poecillid gene, rather than duplication.  
697 The different rod and cone classes produce a wide sensitivity to different wavelengths of  
698 light in the Cumana' Guppy (*Poecilia reticulata wingei*). Variations in synthesis of these  
699 opsins may generate the diversity of types of color perception found in variant populations  
700 of Guppies (Watson 2010). Male polymorphism in Guppies is, in part, the result of an  
701 expanded number of opsin genes, which help foster female sexual selective preference for  
702 orange color spotting and often diversity (rarity) of pattern. Interestingly, a molecular level  
703 study (Ward 2008) showed the bulk of *LWS* mRNA in Cumana' was derived from the *LWS*  
704 *A180* gene. No mention was given of the presence of *SWS* in Cumana', a population in  
705 which Pb is typically non-present in core area populations. Though, presence of underlying  
706 violet iridophores is expected. The expansion of Watson's studies to other Guppy  
707 populations with different color characteristics seems warranted.

708 Teleost species possessing fluorescent color pigment have the capability to absorb  
709 reduced available light, and re-emit at long wavelength. This process, known as  
710 bioluminescence, is produced through a chemical process and is often restricted to deep  
711 water marine species. Study of those emitting red luminescence has shown that  
712 mechanisms utilized in long wave fluorescence involves the collection and modulation of  
713 overlapping dendritic melanophores and motile dendritic red iridophores in “chromatophore  
714 complexes” (Wucherer 2012, 2014). Individuals expressing Pb exhibit higher violet to blue  
715 iridophore density. Whether this results from increased cell population levels or simply the  
716 result of increased visibility from reduction of yellow xanthophores has not been  
717 determined. Existing red erythrophore populations appear unaltered.

718 While bioluminescence is not known to be applicable to *P. reticulata*, microscopic results  
719 (Bias, *unpublished*) in both Pb and non-Pb are suggestive of the aggregation of motile  
720 melanophores in conjunction with the collection of blue and violet iridophores among,  
721 between and beneath dendritic structures, forming similar chromatophore units (**Fig 17**). A  
722 similar association has been shown in general imagery of recent research (*Fig. 1 and Fig.*  
723 *6c*, Kottler 2014). Whether this represents increased population numbers or density, or  
724 simply increased visibility in conjunction with guanine crystalline platelets was not  
725 determined.

726

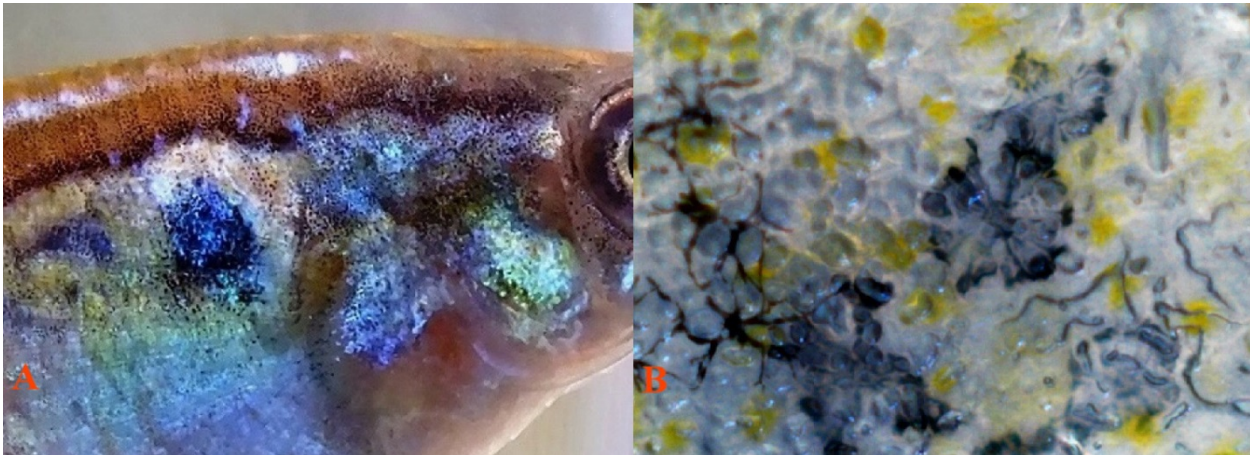

727  
728 **Fig 17. (A)** Heterozygous Pb modified Dendritic melanophore-iridophore chromatophore  
729 units. (photo), and **(B)** Non-Pb Dendritic melanophore-iridophore chromatophore units.  
730 (100X non-dissect, reflected lighting).

731

732 Goda (1995) reported the existence of what appear to be minimally-reflective blue  
733 chromatophores (cyanophores) in two marine species; to this date no such dendritic blue  
734 color pigment cells were identified in *Poecilia reticulata*. Nakajima (1999) in a brief report  
735 noted “dendritic “bluish-white” chromatophores” with reflective qualities, observable only by  
736 means of a fluorescence microscopy. He stated these structures could not be seen with  
737 standard reflective or incident light microscopes. This was found only in one strain (an  
738 undescribed type of *albino*) out of 17 strains studied; he suggested the result of genetic  
739 polymorphism, i.e. strain specific and not species specific.

740

## 741 **UV Vision and Mate Choice**

742 An inaugural study into UV vision and mate selection concluded female preference for  
743 UV+ males, and males slightly preferring UV- females (Smith 2002). In conclusion, it was  
744 thought hue discrimination vs. brightness was the primary positive benefit of UV  
745 capabilities. While this study was based on sexual selection preference in matings, non-  
746 sexual preference origins based on food color detection have been shown (Rodd 2002).

747 Prior studies heavily focused on the shallow water habitat of Guppies, subject to UV  
748 radiance from the sun. None had attempted to assert a direct correlation between UV  
749 reflected color, pattern and vision, mate choice, and individual preferences. Several of  
750 these earlier studies re-affirmed courtship activity was at its highest during dawn and dusk.  
751 These are periods during which SWS and LWS are visible from low angle ambient sunlight  
752 (Endler 1987, 1991, 1992; Loew 1990).

753 Smith concluded that there was no discernable UV preference between early morning  
754 simulations 1-3 hours after lights on or 1-6 hours, with 1-3 being indicated as traditional  
755 testing time by researchers (Smith 2002). This is worthy of note for at least two reasons:  
756 1. As previously noted, yellow color pigment in Guppies is highly motile (subject to  
757 constriction of yellow pigment cells and ectopic melanophores). Expression is often based  
758 on hierarchal ranking and further influenced by courtship display. Therefore, during early  
759 morning hours actual expression of yellow is commonly reduced or near non-existent after  
760 long periods of darkness. This alters general expression of brightness in xantho-  
761 erythrophore orange spotting and yellow ornaments in early hours. In turn, this constriction  
762 temporarily increases the visibility of underlying reflective structural color and pattern (Bias,  
763 *unpublished observations and data*). 2. If present, Pb as one of its primary modifications  
764 further removes yellow color pigment cells and increases visibility and/or population levels  
765 of UV reflective violet iridophores, further altering previously mentioned expressions in both  
766 early morning and late afternoon hours.

767 *P. reticulata* have been shown to possess transparent ocular media (Douglas and  
768 Hawryshyn, 1990), making them sensitive to UV spectrum in the absence of visual pigments  
769 in cones. While little is known in regard to *reticulata* transparent transmission, some  
770 species of mammals have been shown with sensitivity in the 320-340 nm range (see  
771 *citations*, Douglas 2014). Several studies confirm the presence of UV- sensitive retinal  
772 cones, UV- transmittable ocular media, and SWS opsin genes in Guppies (Douglas 1989,  
773 1990; Archer 1987, 1990; Weadick 2007; Ward 2008; Watson 2010; Smith 2002).

774 While Archer was unable to prove the existence of visual pigments extending into the  
775 accepted starting range for peak sensitivity (*maximum absorbance* -  $\lambda_{max}$ ) in UV spectrum  
776 (UVA 380-400nm), he showed well marked clusters at  $\lambda_{max}$  410nm, 465nm and 573nm. He  
777 concurred with earlier studies asserting Guppies are polymorphic for color vision in LWS,  
778 with most rhodopsin-porphyrpsin polymorphism in cones absorbing yellow, orange and  
779 red. Kemp in turn reported UV reflectance in violet-blue iridophores and orange spots  
780 ranging from 350-400nm (Kemp 2008). A molecular level study (Ward 2008) indicates a  
781 higher than normal duplication and divergence of 4 distinct LWS in *Poecilia*, as compared to  
782 other species. Expressed concurrently, they provide the means for both increased SWS and  
783 LWS discrimination.

784 Temperature has been shown to have direct effect on corneal-positive deflection in dark-  
785 adapted spectral sensitivity under varied wavelengths in Zebrafish. The result was a shift in  
786 rod visual pigments. Cold water (22-25° C) spectral sensitivity resulting from a mixture of  
787 rhodopsin-porphyrpsin, and warm water (22-25° C) rhodopsin. Under both conditions  
788 contributions were made by UV cones at  $\lambda_{max}$  362 nm (Saszik 1998). Seasonal variation in  
789 composition of rhodopsin-porphyrpsin levels has been shown in Masked Greenling  
790 (*Hexagrammos octogrammus*) resulting in resulting in significant  $\lambda_{max}$  shift to LWS  
791 (Kondrashev 2008). It is conceivable that similar fluctuations in Guppy vision may occur  
792 under seasonal lighting and temperature changes in the wild, and fluctuations under  
793 laboratory study. If so, these fluctuations may elicit distinctly visual responses, in Pb and  
794 non-Pb wavelength discrimination for breeding preferences. Similar consideration should  
795 then be given to predatory response systems.

796 With the discovery of variation in opsin expression of the Guppies nine opsin cones  
797 between individuals, it has been suggested that new designs in behavioral study are  
798 warranted in regard to mate choice (Rennison 2011). Modification of iris pigment is noted in  
799 Pb, resulting in increased levels of violet iridophores, near predominance, as compared to

800 non-Pb. A similar situation is also found with the modification by other traits, such as Metal  
801 Gold (*Mg*) (Bias, *unpublished breeding notes*), producing not only proliferation of reflective  
802 yellow color pigments in the body, but also in the scleral ring and iris. Developmental  
803 changes suggest enhanced wavelength discrimination in adults as compared to juveniles  
804 (Laver 2011). Modifiers of corneal dorsal / ventral oriented pigmentation in both males and  
805 females, such as Pb and Mg, may produce results which act as “corneal filters”, not limited  
806 to the seasonal restrictions previously discussed, in fostering SWS and LWS discrimination.  
807

## 808 Predation

809 A study shows that environmental light has an effect not only on spectral sensitivity  
810 based on level of maturity, but also coloration independent of age (Hornsby 2013). Greater  
811 risk from predation occurs during periods of highest environmental lighting conditions  
812 (Endler 1987). Our supposition is that the primary benefit of erythristic Pb modification (**Fig**  
813 **18A-B**) is derived from low light conditions; either in heavily forested upland canopy and/or  
814 during periods of low angle sunlight in the early morning and late afternoon. This is when  
815 reflective qualities of Pb modifications are likely to become highly visible in the UV and/or  
816 near-UV spectrum (**Fig 18A**), even though to the naked eye both Pb and non-Pb color is  
817 nearly identical during this time. While in open canopy and/or during periods of bright high  
818 angle sunlight non-Pb appears “brighter orange”, as compared to Pb appearing “darker  
819 orange” (**Fig 18B**), and is favored as a sign of male fecundity.  
820

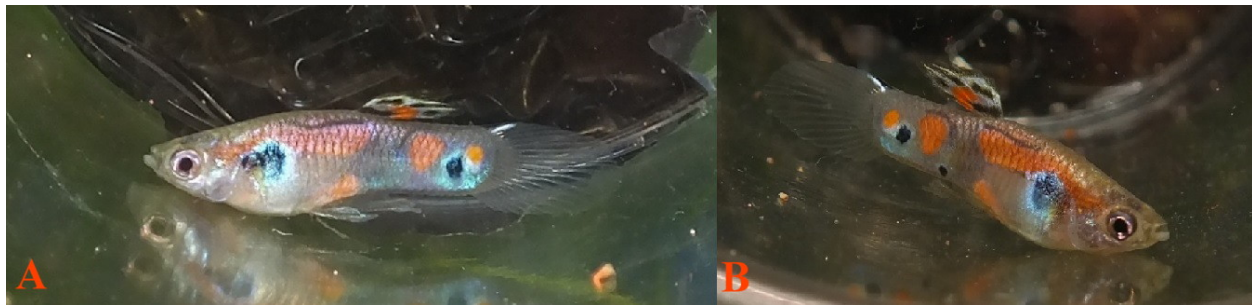

821  
822 **Fig 18. (A)** Pb male expression with low angle ambient light source appearing modified  
823 pink, **(B)** Pb male expression, in same individual, lacking low angle ambient light source  
824 appearing dark red.  
825

826 In a study of the Trinidadian Pike Cichlid (*Crenicichla frenata*), it was noted *Poecilia*  
827 *reticulata* males generally express not only reduced polymorphism, but also reduction in the  
828 intensity of color and pattern. Results indicate that predation imposes restriction on male  
829 ornaments expressing patterns comprised of blue and iridescent structural color spots  
830 (Endler 1980; Kemp 2009). Millar also suggests the results indicate that teleost predation  
831 favors less orange spotting with smaller size, with an indirect effect by local predatory  
832 shrimp (Millar 2006). In follow-up Millar generally finds, “*high-predation males typically*  
833 *have more relative UV reflectance when all rivers and sites are considered in the same*  
834 *analysis*” (Millar 2012), further showing UV as a private signal in some populations, but not  
835 all. Worthy of note, this and several other studies postulate that other factors are  
836 contributing to selection beyond a simple high-low predation contrast (Millar 2006; Karim  
837 2007). Pb modification of both ornaments and overall coloration should be considered in  
838 such future studies.

839 Weadick asserts in his discussion, “*establishing that one of the guppy’s most dangerous*  
840 *predators can detect a wide swath of the spectrum represents a critical step toward fully*  
841 *understanding the nature of selection on color patterns in this system [C. frenata - P.*  
842 *reticulata predation]*” (Weadick 2012). Citing earlier studies, the author cautions against  
843 interpreting results, based on limited LWS / SWS receptor sensitivity studies, involving

844 effects of predation on prey color and pattern. Limited or single samples do not rule out  
845 variability in visual receptors in a single species of predator in multiple locations within its  
846 range.

847 Of five opsins isolated in more recent *reticulata* studies, two were identified as  
848 “maximally sensitive” in producing SWS vision. Of more importance in consideration of  
849 potential Pb biotic benefit from modification, it was found that *C. frenata* was notably  
850 “insensitive” to UV light, being unable to discriminate hues in the lower part of the visual  
851 spectrum (Weadick 2012).

852 The predatory prawn (*Macrobrachium crenulatum*) has been shown capable of UV  
853 discrimination; prey individuals expressed higher degree of melanophore spotting and  
854 reduction in levels of reflective iridescence (Endler 1978; Rodd 1991; Kemp 2008). Several  
855 studies indicated no reduction in the amount or size in orange spotting, as piscine predators  
856 are generally unable to detect Long Waves (Endler 1978; Houde and Endler 1990; Kemp  
857 2008). Generally, this indicates the absence or reduction of Pb modification for SWS UV  
858 visibility in the presence of *M. crenulatum*. While the color photo quality (Fig. 7g, Endler  
859 1978) of Paria population makes it difficult to verify presence of Pb, it is suggested.  
860 Conversely, the photo quality (Fig. 3, Kemp 2008) shows large orange spot modification  
861 from Pb in the Marianne population and predominance of Pb modification in the Quare  
862 population. The author noted, “relatively low UV peaks in Marianne fish colours are notable  
863 given that this population is the only one to co-exist with a strongly UV-sensitive predator  
864 (*M. crenulatum*)”.

865 To avoid predation, *M. crenulatum*, is primarily a nocturnal feeding species (Bauer 2011)  
866 that in turn preys heavily on *P. reticulata* (Magurran 2005). Orange spots on the pinchers  
867 were shown to act as a diurnal sensory lure in attracting Guppies to the anterior head  
868 region of the prawn. This sensory bias was successful to a higher degree in allopatric  
869 *reticulata* populations, and to a lesser degree in sympatric *reticulata* populations (Rodd  
870 1991; De Serrano 2012). While increased predation on any age class of individuals will  
871 have an impact on the overall constitution of color and pattern, the overall effect of  
872 predation on Pb modification of said pattern will be reduced by an autosomal dominant  
873 mode of inheritance that is transmitted by either sex. This, being in direct contrast to early  
874 opinion that “anything except predation has been important in the evolution of the orange  
875 colouration” (Rodd 1991).

876 Hughes, et al., (2005) raises the question of to what degree does balancing selection  
877 contribute to the maintenance of color pattern and size variation found within a population  
878 or across populations? Statistical analysis of sib x sib breeding results structured to identify  
879 Genetic-by-Environment interactions ( $G \times E$ ) effects on color and size were undertaken.  
880 Results showed that while dietary intake did have the expected influence on size, it did not  
881 have any detectable influence on color and pattern. But they did not consider Purple Body  
882 coloration in their study.

883 According to Hughes, three mechanisms had been previously put forth at the time to  
884 explain the maintenance of these polymorphisms: 1. Gene flow between populations with  
885 differing selection regimes (Endler 1980), 2. Negative genetic correlation between male  
886 survival and attractiveness (*antagonistic pleiotropy*) (Brooks 2000), 3. Negative frequency-  
887 dependent selection (Farr 1977, 1980b; Hughes 1999). These proposed mechanisms are  
888 not mutually exclusive.

889 This leaves us with a bit of a dilemma, as these previous studies dealt with variations in  
890 color and/or pattern type and size. The resultant benefits of Pb on mating success likely  
891 have little specifically to do with male rarity or novelty (Farr 1977) since Pb is often present  
892 at high frequencies in populations. Rather they derive primarily from increased near-UV  
893 visibility under specific ambient lighting conditions (time of day) in conjunction with water  
894 conditions (turbidity and/or chemistry) and locale (upper and/or lower drainage, canopy  
895 cover or lack thereof).

896 The presence of X-linked and/or autosomal coloration in females (limited to *xantho-*  
897 *erythrophores* and *melanophores*) has been shown through testosterone treatment in high-  
898 low predation sites (Gordon 2012). High predation females consistently showed less  
899 coloration compared to low predation. Expression of homozygous autosomal dominant *Pb*,  
900 similar to identified autosomal recessives found in *Poecilia reticulata*, is a modifier of total  
901 existing body color and pattern pigmentation (*xantho-erythrophores*, *structural colors* and  
902 *melanophores*) in both males and females.

903 It is an autosomal trait capable of modifying extent color and pattern found in a  
904 population and across populations, acting as “a permanently protected reservoir available in  
905 the female population in which, whether they are present in heterozygous or homozygous  
906 condition, they are sex limited and will not be phenotypically expressed” (Haskins 1951).  
907 The *Pb* gene is partly protected from strong selection by its presence in females, where it is  
908 minimally expressed. The Haskins’ study set out to, “ascertain, in a very general way,  
909 whether X-linked and autosomal linked color patterns occur in wild populations”. While not  
910 identifying any specific traits, they concluded in their discussion, “data... ..indicates that this  
911 in-deed is true”.

912 Here we have the Purple Body (*Pb*) gene identified as the first autosomal gene to be  
913 described as existent in high frequencies in both wild and Domestic Guppy populations; one  
914 capable of pleiotropic effects on all existing color and pattern elements at multiple loci.  
915 Several questions arise. Firstly, “Should *Pb* with an autosomal mode of inheritance, in itself,  
916 be considered a mechanism capable of balancing overall color and pattern polymorphisms?”  
917 Secondly, “While positive in overall benefit under specific conditions, does the Purple Body  
918 condition present a detrimental pleiotropy to the individual, especially in homozygous  
919 condition?” These questions seem worthy of further study in controlled lab settings and  
920 under natural conditions.

921 Studies continue to focus on fitness through heterozygosity maintained and limited to  
922 male ornamentation through multilocus heterozygosity (*MLH*, Herdegen 2014). Studies on  
923 female ornaments in “wild-type” are few if any. This is likely based on the assumption that  
924 wild-type *P. reticulata* females are essentially “color-trait neutral” as a form of camouflage,  
925 with expression of pigmentation limited to Domestic Guppy strains (Goodrich 1944;  
926 Lindholm 2002; Kottler 2013 and 2014), expressing limited coloration to the naked eye.  
927 Yet, current microscopy reveals female coloration is not solely limited to counter-gradient  
928 expression for the benefit of camouflage.

929 Females possess all classes of chromatophores, and are subject to *Pb* modification for  
930 expression of near-UV reflective qualities as well. *MLH* was correlated as a “significant  
931 predictor” in relation to overall area of spotting; it was not linked to total numbers of spots.  
932 The end results favored “genome-wide heterozygosity” based on individual markers for  
933 spotting identified as non-heterozygous. The potential immunologic benefits of  
934 heterozygosity have long been subject of study; the major histocompatibility complex (*MCH*,  
935 Yamazaki 1976; Brown 1997), the parasite-resistance hypothesis (Hamilton and Zuk  
936 1982). A direct correlation has linked to heterozygosity and male fecundity in the form of  
937 motivation and increased sperm counts (Mariette 2006; Zajitschek and Brooks 2010). The  
938 same correlation is known to result in a higher degree of female fecundity. Heterozygous  
939 *Pb* is once again worthy of prime consideration.

940 In a study of *Betta splendens* (Clotfelter 2007), evidence indicated that purple males  
941 derive a greater immune response than do red males. When both color morphs were  
942 supplemented with additional carotenoids, purple males diverted fewer carotenoids to color  
943 maintenance and exhibited greater immune response. “Unlike other species in which this  
944 trade-off has been examined, where the ability to maintain carotenoid-based coloration is  
945 condition dependent and results in a range of red and less-red phenotypes, male *B.*  
946 *splendens* have genetically determined color morphs... ..Redder individuals (positive  
947 *PC2* [sic 600-70 nm] values) provided with supplemental carotenoids showed an increased  
948 inflammatory response to PHA [sic phytohemagglutinin] and greater redness, whereas bluer

949 individuals (negative PC2 [sic 320-520 nm] values) showed no change in coloration and  
950 instead mounted an even greater immune response.” They suggest that red males require  
951 higher carotenoid concentrations and are genetically oriented to load balance stockpiled  
952 reserves between color maintenance and health issues.

953 Is heterozygous *Pb* selectively favored in males while homozygous *Pb* is unfavorable? If  
954 so, then balancing selection would tend to maintain both alleles in the population. If the  
955 heterozygote is greatly superior to the two homozygotes, then selection would tend to  
956 maintain both alleles balanced in the population. If for example the initial allele frequencies  
957 were 0.5 *Pb* and 0.5 *pb* that would generate 25% *Pb/Pb*, 50% *Pb/pb*, and 25% *pb/pb* in the  
958 next generation in the absence of selection. But if selection eliminates most of the *Pb/Pb*  
959 males and perhaps some of the *pb/pb* males as well, then the *Pb/pb* males would be  
960 selectively favored in each generation due to heterozygote superiority. The final frequencies  
961 of each of the two alleles and three male genotypes would depend upon the sum of the  
962 selective pressures on each of the individual genotypes, and these might vary significantly  
963 over time and locality.

964

## 965 Feral Populations

966 Studies of feral Guppy introductions are often considered of lesser value in comparison  
967 to those done in native locales. While of value from an evolutionary standpoint in  
968 subsequent studies, they often lack historical founding population references. Yet, in many  
969 ways these events are no different from natural colonization by single individuals or limited  
970 numbers. Intentional feral introductions, of known parentage, have been performed in  
971 several locations and are thought to offer a more complete comparative analysis resulting  
972 from environmental change. As previously stated such introductions, seemingly unknown to  
973 researchers, are often revealed by analysis to share a common characteristic: the presence  
974 of *Pb* (**Fig 19**).

975

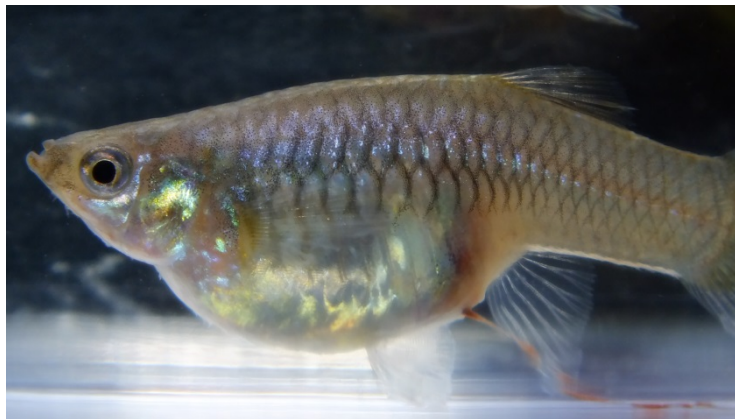

976  
977 **Fig 19.** Homozygous (*Pb/Pb*) wild-type female.  
978

979 One intentional feral introduction, considered of value by weight of published studies,  
980 involves the stocking of high predation Yarra River (Trinidad) stocks into low predation  
981 Damier River (Trinidad), with later colonization of high predation Damier. Attempts to  
982 capture expression of orange and reflective qualities of populations under variant ambient  
983 lighting have been made (Karim 2007; Kemp 2009). Observations were limited to orange,  
984 black and blue and total amount of pooled color. The Damier population (high and low)  
985 showed no divergence in orange values as compared to the foundation high predation Yarra  
986 population. A rapid increase in survival fitness traits has been shown to be comparable to  
987 that of captive reared wild stocks (Gordon 2009). Final analysis in both studies was based  
988 on commonly used statistical measures.

989 Here again, the presence or absence of Pb within the overall population was not directly  
990 studied. Pb has been demonstrated to have potential implications on the divergence  
991 through modification of existent orange and structural coloration.

992 Domestic Breeders have demonstrated that specific genes for many expressions of  
993 female ornaments are contained in the genotype through sex-linked (possibly in the form of  
994 initial cross-over events) and autosomal modes of inheritance. Still other traits stem from  
995 new mutations or recombination in long-term captive bred stocks (domestic and wild).  
996 Many are known to persevere in both controlled breeding's of wild and feral populations  
997 (*Turure high-low controlled feral introduction*, Gordon 2012). The study of non-expressed  
998 female coloration (wild and feral) by Gordon was limited to testosterone treatment for  
999 xantho-erythrophore color pigment and melanophores. It is erroneous to assume that wild  
1000 and feral females do not express variability in violet-blue structural iridophore  
1001 ornamentation in limited form, easily discernable to the trained naked eye. The Purple  
1002 genotype is now demonstrated to be a potential female study marker in heterozygous and  
1003 homozygous form, in both wild-type and controlled breeding's.

1004 Studies of wild and feral populations fail to support a correlation between in-breeding  
1005 and increased level of spotting (Zajitschek and Brooks 2010). Similar color patterns have  
1006 been found in wild and introduced feral populations, in both high and low predation locales,  
1007 each expressing no measureable differences in either number or size of spotting (Martinez  
1008 2016). Orange spotting, in controlled laboratory settings, has been shown to reflect  
1009 increased expression with a higher inbreeding co-efficient (Nicoletto 1995; Sheridan 1997;  
1010 van Oosterhout 2003; Mariette 2006). A similar observation is found in the tanks of  
1011 Domestic Breeders through artificial selection, as evidenced by many diverse carotenoid  
1012 xantho-erythrophore (yellow-orange) and pteridine (red) phenotypes, in spotted and solid  
1013 expressions. The Purple gene has now been identified as having the ability to modify extent  
1014 genome-wide yellow-orange-red color and pattern spotting in heterozygous and  
1015 homozygous fashion.

1016 Female preference consistently fosters sexually selected traits across populations in  
1017 selection for males exhibiting similar phenotypic traits (Kodric-Brown 1985). Xantho-  
1018 erythrophores are considered indicators of male over-all fitness and therefore are attractive  
1019 to females. Diet has been shown to increase brightness of existing orange spotting, but not  
1020 size of spots (Kodric-Brown 1989). Orange carotenoid pigments have been shown to elicit  
1021 positive response initially at a distance and catch the female's attention. While the  
1022 importance of structural violet-blue iridophores take precedence during actual courtship and  
1023 retain the female attention (Endler 1983, 1984; Kodric-Brown 1989 and 1996).

1024 Kodric-Brown (1989) utilized two study populations, Paria wild [*Trinidadian*] and Jemez  
1025 feral [*McCauley Springs, NM*]. Jemez feral express reduced orange spotting in comparison  
1026 to other populations. Not surprisingly, it was reported "Females from the Jemez population  
1027 showed significant disagreement in their preferences for individual males." Jemez males  
1028 exhibit increased iridophore spotting (blue and white), and increased circular and linear  
1029 melanophore spots. Jemez males are very iridescent violet-blue (**Fig 20-21**), often  
1030 expressing: *Iridescent (Ir)*, (Winge 1922b; See also: *Iridescent (Ir)*, Blacher 1928; *Smargd*  
1031 *Iridescent (Smlr)*, Dzwillo 1959; *Blue Iridescent Spot*, Kottler 2013; *Reflective Dorsal Spot*  
1032 (*RDS*), Bias 2013).

1033



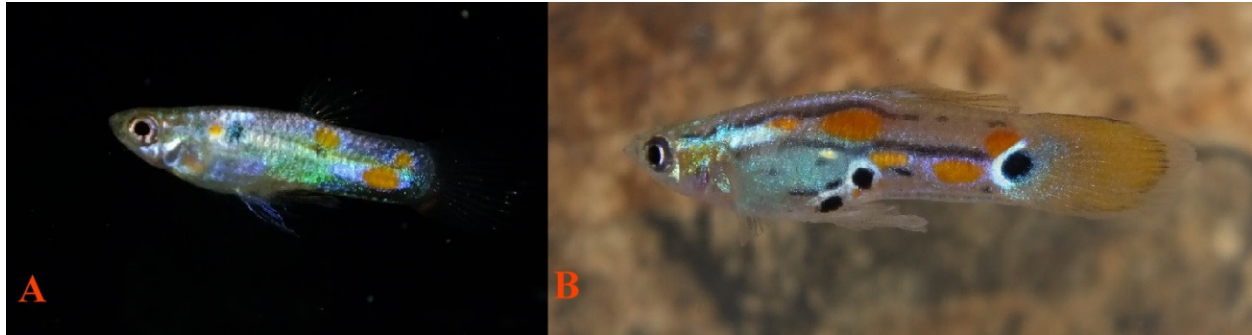

1034  
1035  
1036  
1037

**Fig 20. (A-B)** Wild-caught Pb Jemez males, McCauley Springs, NM (2016 Collection), dark spotting ornament expression lacking low angle ambient light source.

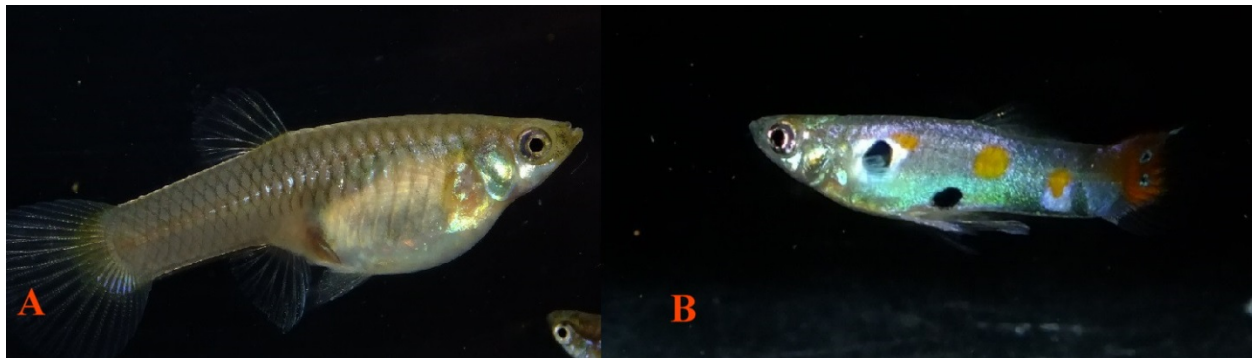

1038  
1039  
1040  
1041  
1042

**Fig 21. (A)** Wild-caught Pb female expressing Pb modification in caudal base, and **(B)** wild-caught Jemez male, McCauley Springs, NM (2016 Collection), dark spotting ornament expression lacking low angle ambient light source.

1043  
1044  
1045  
1046  
1047  
1048  
1049  
1050

The majority of Jemez individuals, males and females, recently collected and reared in subsequent captive breeding are modified Pb (Bias, *unpublished breeding notes*). It is assumed that there is sexual selection for autosomal Pb modification in both males and females because of increased UV visibility interacting with violet-blue iridophores. A recent study confirms that females do have strong preference for UV reflective color pattern in males, though male preferences were omitted in the study (Kodric-Brown 2002). Jemez males expressed the majority of their iridescent colors below 400 nm (*near-UV and UV spectrum*).

1051  
1052  
1053  
1054  
1055  
1056  
1057  
1058  
1059

Kodric-Brown (2002) stated: "Among the iridescent colours, white and purple strongly reflected below 400 nm, but green and blue did not. Gold (yellow-orange) also showed a UV component. Generally, the area of UV reflectance closely matched the area of iridescence visible in longer wavelengths... ..Although the overall colour pattern was the same when viewed in the visible and the short wavelengths, certain aspects of the pattern were more noticeable in the UV wavelengths. Melanin (black) spots surrounded, either completely or partially, by a ring of iridescent white, and gold spots next to black areas provided a striking contrast in the UV." As previously shown melanophores spots are known to reside in close proximity and intermingled with violet-blue iridophores.

1060  
1061  
1062  
1063  
1064  
1065  
1066  
1067

The obvious benefits of increased visibility and/or numbers of violet iridophores through Pb modification are again asserted. Guppies are known to have multiple UV sensitive receptors, as opposed to native predators that are UV insensitive with a reduced number of receptors in short wavelengths. Feral populations, lacking reduced predation, such as Jemez, take advantage and express increased incidence in all areas of reflectivity, including "white patches". The latter being highly UV reflective, but also visible in shorter wavelength and subject to predation in wild populations (Kodric-Brown 2002). Pb as an autosomal modifier of the existing phenotype, has now been shown to increase some

1068 chromatophore populations and/or visibility in the UV spectrum. This in part, proves earlier  
1069 research suggesting, "Selection should favour signalling in these short 'private'  
1070 wavelengths" (Endler 1991).  
1071

## 1072 **Summary and Conclusions**

1073 From what can be ascertained, the bases of cellular studies continue in attempts to  
1074 quantify orange and structural color and/or pattern values into measurable form, without  
1075 taking into account two distinct genotypes found in wild and feral populations: Pb and non-  
1076 Pb. Yet, recurrent photographic evidence such as provided by Millar and Hendry [*Fig. 2 UV*  
1077 (*a*) and colour (*b*) of a male guppy from the low-predation sampling site in the Aripo River]  
1078 (Millar and Hendry 2012), and Gotanda and Hendry [*Fig. 3, M14 (HP) and M16 (LP)*]  
1079 (Gotanda and Hendry 2014), clearly exhibit UV-enhanced modification by the Purple gene.

1080 Crosses between Purple Body and non-purple body guppies prove that the Purple Body  
1081 gene is not simply Y-linked. Although the results did not completely rule out the possibility  
1082 that the Purple Body gene is located in a frequently recombining pseudo-autosomal region  
1083 of the sex chromosomes, that interpretation is considered to be extremely unlikely. The final  
1084 conclusion is that the Purple Body gene is located on an autosome, with an incompletely  
1085 dominant mode of inheritance.

1086 *Poecilia reticulata* exist in a heretofore undocumented polymorphic state; Purple Body  
1087 (*Pb*) and non-Purple Body (*non-Pb*). The co-existence of the two phenotypes suggests a  
1088 selective advantage under predation (crypsis) and in sexual selection (conspicuous pattern)  
1089 under diverse ambient lighting conditions.

1090 The violet-blue chromatophore unit and removal of xanthophores by Pb modification is  
1091 required to produce an all-purple phenotype. The Purple gene has the ability to modify  
1092 extent genome-wide chromatophore populations in heterozygous and homozygous  
1093 condition, with increased visibility in the UV spectrum. As a result, this demonstrates  
1094 selection favoring short "private" wavelength signaling.

1095 Pb is now identified as the first polymorphic autosomal gene to be described as existent  
1096 in high frequencies in wild, feral and Domestic Guppy populations. It is capable of  
1097 pleiotropic effect on all existing color and pattern elements at multiple loci. It should  
1098 therefore be considered a strong candidate for further studies involving "relationships  
1099 between spectral and ultrastructure characteristics" in orange ornamentation, and extending  
1100 to color and/or pattern as a whole as suggested by Kottler (2014). A mechanism is  
1101 identified by which Pb is capable of balancing overall color and pattern polymorphisms, in  
1102 turn providing fitness through heterozygosity in diverse complex habitats. We hope that  
1103 Purple will be mapped to its linkage group.

1104 Throughout this study a recurring thought has consistently arisen in the minds of the  
1105 author(s). That being, "Where any prior published results based on statistical analysis of  
1106 quantified male ornaments skewed by failure to identify these two distinct sympatric  
1107 populations?" In some instances, it would seem XY-linked heritability, brightness, intensity  
1108 of orange chroma and hue in male ornaments might in an indirect fashion balance out end  
1109 results. While in others, failure to identify the Pb gene may have biased their results.  
1110

## 1111 **Photo Imaging**

1112 Photos by author(s) were taken with a Fujifilm FinePix HS25EXR; settings Macro, AF:  
1113 center, Auto Focus: continuous, varying Exposure Compensation, Image Size 16:9, Image  
1114 Quality: Fine, ISO: 200, Film Simulation: Astia/Soft, White Balance: 0, Tone: STD, Dynamic  
1115 Range: 200, Sharpness: STD, Noise Reduction: High, Intelligent Sharpness: On. Lens:  
1116 Fujinon 30x Optical Zoom. Flash: External mounted EF-42 Slave Flash; settings at EV: 0.0,  
1117 35mm, PR1/1, Flash: -2/3. Photos cropped or brightness adjusted when needed with  
1118 Microsoft Office 2010 Picture Manager and Adobe Photoshop CS5. All photos by author(s),  
1119 unless otherwise noted.

1120

## 1121 **Microscopy**

1122 All Digital Image processing by conventional bright and dark field equipment. AmScope  
1123 M158C. Camera(s): 1. MD35, Resolution: 0.3MP 2. MD200, Resolution: 2MP USB  
1124 Digital, Sensor: Aptina (Color), Sensor Type: CMOS. Software: AmScope for Windows.  
1125 An attempt was made to restrict ambient light during both daytime and nighttime imaging  
1126 of specimens. Imaging was performed with reflected or transmitted practical light sources  
1127 as indicated. Where delineation in results warranted, a series of three photos from each  
1128 location were taken and presented in the results; reflected (top light only), transmitted  
1129 (bottom light only), combined reflected + transmitted (top and bottom light).

1130 For purposes of this study low resolution photos were often preferred over higher  
1131 resolution for clarity at settings of 40X, 100X or 400X. No images were stained. As  
1132 identified, individual images are full body (non-dissected), or manually de-fleshed  
1133 (dissected) skin samples. Samples were air dried for minimal time periods of less than one  
1134 hour for aid in dissection. All samples and images from right side of body, unless  
1135 otherwise noted. No cover glass was utilized, to reduce damage to chromatophore shape,  
1136 structure and positioning. No preservatives were used during imaging, though rehydration  
1137 was done as needed for clarity. All photos were by the senior author, unless otherwise  
1138 noted.  
1139

## 1140 **Ethics Statement**

1141 This study adhered to established ethical practices under AVMA Guidelines for the  
1142 Euthanasia of Animals: 2013 Edition, S6.2.2 Physical Methods (6).

1143 All euthanized specimens were photographed immediately, or as soon as possible, after  
1144 temperature reduction (rapid chilling) in water (H<sub>2</sub>O) at temperatures just above freezing  
1145 (0°C) to avoid potential damage to tissue and chromatophores, while preserving maximum  
1146 expression of motile xantho-erythrophores in Pb and non-Pb specimens. All anesthetized  
1147 specimens were photographed immediately after short-term immersion in a mixture of 50%  
1148 aged tank water (H<sub>2</sub>O) and 50% carbonated water (H<sub>2</sub>CO<sub>3</sub>).

1149 All dried specimens photographed immediately after rehydration in cold water (H<sub>2</sub>O).  
1150 Prior euthanasia was by cold water (H<sub>2</sub>O) immersion at temperatures just above freezing (0  
1151 °C). MS-222 (Tricaine methanesulfonate) was not used to avoid the potential for reported  
1152 damage and/or alterations to chromatophores, in particular melanophores, prior to slide  
1153 preparation.  
1154

## 1155 **Competing Interests and Funding**

1156 The authors declare that they have no competing interests. Senior author is a  
1157 member of the Editorial Board for Poeciliid Research; International Journal of the  
1158 Bioflux Society, and requested non-affiliated independent peer review volunteers.  
1159

1160 The authors received no funding for this work.  
1161

## 1162 **Notes**

1163 This publication is number one (1) of four (4) by Bias and Squire in the study of Purple  
1164 Body (*Pb*) in *Poecilia reticulata*:  
1165

- 1166 1. The Cellular Expression and Genetics of an Established Polymorphism in *Poecilia*  
1167 *reticulata*; "Purple Body, (*Pb*)" is an Autosomal Dominant Gene,
- 1168 2. The Cellular Expression and Genetics of Purple Body (*Pb*) in *Poecilia reticulata*, and its  
1169 Interactions with Asian Blau (*Ab*) and Blond (*bb*) under Reflected and Transmitted Light,



- 1222 16. Clotfelter, E. D., Ardia, D. R., & McGraw, K. J. (2007). Red fish, blue fish: trade-offs  
1223 between pigmentation and immunity in *Betta splendens*. *Behavioral Ecology*, *18*(6),  
1224 1139-1145.
- 1225 17. De Serrano, A. R., Weadick, C. J., Price, A. C., & Rodd, F. H. (2012). Seeing orange:  
1226 prawns tap into a pre-existing sensory bias of the Trinidadian guppy. *Proceedings of*  
1227 *the Royal Society of London B: Biological Sciences*, *279*(1741), 3321-3328.
- 1228 18. Deere, K. A., Grether, G. F., Sun, A., & Sinsheimer, J. S. (2012). Female mate  
1229 preference explains countergradient variation in the sexual coloration of guppies  
1230 (*Poecilia reticulata*). *Proceedings of the Royal Society of London B: Biological*  
1231 *Sciences*, *279*(1734), 1684-1690.
- 1232 19. Douglas, R. H., & Hawryshyn, C. W. (1990). Behavioural studies of fish vision: an  
1233 analysis of visual capabilities. In *The visual system of fish* (pp. 373-418). Springer  
1234 Netherlands.
- 1235 20. Douglas, R. H., & Jeffery, G. (2014). The spectral transmission of ocular media suggests  
1236 ultraviolet sensitivity is widespread among mammals. *Proceedings of the Royal*  
1237 *Society of London B: Biological Sciences*, *281*(1780), 20132995.
- 1238 21. Douglas, R. H., & McGuigan, C. M. (1989). The spectral transmission of freshwater  
1239 teleost ocular media—an interspecific comparison and a guide to potential ultraviolet  
1240 sensitivity. *Vision research*, *29*(7), 871-879.
- 1241 22. Dzwillo, M. (1959). Genetische Untersuchungen an domestizierten Stämmen von  
1242 *Lebistes reticulatus* Peters. *Mitt Hamburg Zool Mus Inst*, *57*, 143-186.
- 1243 23. Endler, J. A. (1984). Natural and sexual selection on color patterns in poeciliid fishes.  
1244 In *Evolutionary ecology of neotropical freshwater fishes* (pp. 95-111). Springer  
1245 Netherlands.
- 1246 24. Endler, J. A., Basolo, A., Glowacki, S., & Zerr, J. (2001). Variation in response to  
1247 artificial selection for light sensitivity in guppies (*Poecilia reticulata*). *The American*  
1248 *Naturalist*, *158*(1), 36-48.
- 1249 25. Endler, J. A. (1980). Natural selection on color patterns in *Poecilia reticulata*. *Evolution*,  
1250 76-91.
- 1251 26. Endler, J. A. (1984). Natural and sexual selection on color patterns in poeciliid fishes.  
1252 In *Evolutionary ecology of neotropical freshwater fishes* (pp. 95-111). Spr  
1253 27. Endler, J. A. (1987). Predation, light intensity and courtship behaviour in *Poecilia*  
1254 *reticulata* (Pisces: Poeciliidae). *Animal Behaviour*, *35*(5), 1376-1385.
- 1255 28. Endler, J. A. (1991). Variation in the appearance of guppy color patterns to guppies and  
1256 their predators under different visual conditions. *Vision research*, *31*(3), 587-608.
- 1257 29. Endler, J. A. (1992). Signals, signal conditions, and the direction of evolution. *The*  
1258 *American Naturalist*, *139*, S125-S153.
- 1259 30. Farr, James A. "Male rarity or novelty, female choice behavior, and sexual selection in  
1260 the guppy, *Poecilia reticulata* Peters (Pisces: Poeciliidae)." *Evolution* (1977): 162-  
1261 168.
- 1262 31. Farr, J. A. (1980). Social behavior patterns as determinants of reproductive success in  
1263 the guppy, *Poecilia reticulata* Peters (Pisces: Poeciliidae) an experimental study of  
1264 the effects of intermale competition, female choice, and sexual  
1265 selection. *Behaviour*, *74*(1), 38-90.
- 1266 32. Ford, E. B. (1945). Polymorphism. *Biological Reviews*, *20*(2), 73-88.
- 1267 33. Goda, M., & Fujii, R. (1995). Blue chromatophores in two species of callionymid  
1268 fish. *Zoological science*, *12*(6), 811-813.
- 1269 34. Goodrich, H. B., Josephson, N. D., Trinkaus, J. P., & Slate, J. M. (1944). The cellular  
1270 expression and genetics of two new genes in *Lebistes reticulatus*. *Genetics*, *29*(6),  
1271 584.
- 1272 35. Goodwin, T. W (1984). *The biochemistry of the carotenoids*, vol. II. London: Chapman  
1273 and Hall. 1984. ISBN: 0412237709 (v. 2).

- 1274 36. Gordon, S. P., López-Sepulcre, A., & Reznick, D. N. (2012). PREDATION-ASSOCIATED  
1275 DIFFERENCES IN SEX LINKAGE OF WILD GUPPY COLORATION. *Evolution*, 66(3),  
1276 912-918.
- 1277 37. Gordon, S. P., Reznick, D. N., Kinnison, M. T., Bryant, M. J., Weese, D. J., Räsänen, K.,  
1278 ... & Hendry, A. P. (2009). Adaptive changes in life history and survival following a  
1279 new guppy introduction. *The American Naturalist*, 174(1), 34-45.
- 1280 38. Gotanda, K. M., & Hendry, A. P. (2014). Using adaptive traits to consider potential  
1281 consequences of temporal variation in selection: male guppy colour through time and  
1282 space. *Biological Journal of the Linnean Society*, 112(1), 108-122.
- 1283 39. Grether, G. F., Cummings, M. E., & Hudon, J. (2005). Countergradient variation in the  
1284 sexual coloration of guppies (*Poecilia reticulata*): drosopeterin synthesis balances  
1285 carotenoid availability. *Evolution*, 59(1), 175-188.
- 1286 40. Grether, G. F., Hudon, J., & Endler, J. A. (2001). Carotenoid scarcity, synthetic pteridine  
1287 pigments and the evolution of sexual coloration in guppies (*Poecilia*  
1288 *reticulata*). *Proceedings of the Royal Society of London B: Biological*  
1289 *Sciences*, 268(1473), 1245-1253.
- 1290 41. Grether, G. F., Hudon, J., & Millie, D. F. (1999). Carotenoid limitation of sexual  
1291 coloration along an environmental gradient in guppies. *Proceedings of the Royal*  
1292 *Society of London B: Biological Sciences*, 266(1426), 1317-1322.
- 1293 42. Grether, G. F., Kolluru, G. R., & Nersissian, K. (2004). Individual colour patches as  
1294 multicomponent signals. *Biological Reviews*, 79(3), 583-610.
- 1295 43. Grether, G. F. (2005). Environmental change, phenotypic plasticity, and genetic  
1296 compensation. *The American Naturalist*, 166(4), E115-E123.
- 1297 44. Gundersen, R. E., & Rivera, E. R. (1982). An ultrastructural study of the development of  
1298 the dermal iridophores and structural pigmentation in *Poecilia reticulata*  
1299 (Peters). *Journal of Morphology*, 172(3), 349-359.
- 1300 45. Hamilton, W. D., & Zuk, M. (1982). Heritable true fitness and bright birds: a role for  
1301 parasites?. *Science*, 218(4570), 384-387.
- 1302 46. Haskins, C. P., & Haskins, E. F. (1951). The inheritance of certain color patterns in wild  
1303 populations of *Lebistes reticulatus* in Trinidad. *Evolution*, 216-225.
- 1304 47. Haskins, C. P., Young, P., Hewitt, R. E., & Haskins, E. F. (1970). Stabilised heterozygosis  
1305 of supergenes mediating certain Y-linked colour patterns in populations of *Lebistes*  
1306 *reticulatus*. *Heredity*.
- 1307 48. Hendry Lab (2016). Photos, guppy colour diversity within and between sites. Available  
1308 from: <http://redpath-staff.mcgill.ca/hendry/guppy.html>. Last checked 12.11.16.
- 1309 49. Herdegen, M., Dudka, K., & Radwan, J. (2014). Heterozygosity and orange coloration  
1310 are associated in the guppy (*Poecilia reticulata*). *Journal of evolutionary*  
1311 *biology*, 27(1), 220-225.
- 1312 50. Hornsby, M. A., Sabbah, S., Robertson, R. M., & Hawryshyn, C. W. (2013). Modulation  
1313 of environmental light alters reception and production of visual signals in Nile  
1314 tilapia. *Journal of Experimental Biology*, 216(16), 3110-3122.
- 1315 51. Houde, A. E., & Endler, J. A. (1990). Correlated evolution of female mating preferences  
1316 and male color patterns in the guppy *Poecilia reticulata*. *Science*, 248(4961), 1405-  
1317 1408.
- 1318 52. Hughes, K. A., DU, L., RODD, F. H., & REZNICK, D. N. (1999). Familiarity leads to  
1319 female mate preference for novel males in the guppy, *Poecilia reticulata*. *Animal*  
1320 *Behaviour*, 58(4), 907-916.
- 1321 53. Hughes, K. A., Rodd, F. H., & Reznick, D. N. (2005). Genetic and environmental effects  
1322 on secondary sex traits in guppies (*Poecilia reticulata*). *Journal of evolutionary*  
1323 *biology*, 18(1), 35-45.
- 1324 54. Jourdan, J., Miesen, F. W., Zimmer, C., Gasch, K., Herder, F., Schleucher, E., ... &  
1325 Bierbach, D. (2014). On the natural history of an introduced population of guppies  
1326 (*Poecilia reticulata* Peters, 1859) in Germany. *BioInvasions Records*, 3(3), 175-184.

- 1327 55. K TAKEUCHI, I. (1975). Electron Microscopic Study on Erythrophones of the Guppy,  
1328 *Lebistes reticulatus*Peters. *日本動物学彙報*, 48(4), 242-251.
- 1329 56. Karim, N., Gordon, S. P., Schwartz, A. K., & Hendry, A. P. (2007). This is not déjà vu all  
1330 over again: male guppy colour in a new experimental introduction. *Journal of*  
1331 *evolutionary biology*, 20(4), 1339-1350.
- 1332 57. Kemp, D. J., Reznick, D. N., Grether, G. F., & Endler, J. A. (2009). Predicting the  
1333 direction of ornament evolution in Trinidadian guppies (*Poecilia*  
1334 *reticulata*). *Proceedings of the Royal Society of London B: Biological Sciences*,  
1335 rspb20091226.
- 1336 58. Kemp, D. J., Reznick, D. N., & Grether, G. F. (2008). Ornamental evolution in  
1337 Trinidadian guppies (*Poecilia reticulata*): insights from sensory processing-based  
1338 analyses of entire colour patterns. *Biological Journal of the Linnean Society*, 95(4),  
1339 734-747.
- 1340 59. Khoo, G., Lim, T. M., Chan, W. K., & Phang, V. P. (1999). Sex-linkage of the black  
1341 caudal-peduncle and red tail genes in the tuxedo strain of the guppy, *Poecilia*  
1342 *reticulata*. *Zoologi*
- 1343 60. Khoo, G., Lim, T. M., & Phang, V. P. (2014). Cellular basis of metallic iridescence in the  
1344 siamese fighting fish, *Betta splendens*. *The Israeli Journal of Aquaculture-Bamidgeh*.
- 1345 61. Kirpichnikov, V. S. (1981). The genetics of aquarium fish species. *Genetic Bases of Fish*  
1346 *Selection*, 77-103.
- 1347 62. Kodric-Brown, A., & Johnson, S. C. (2002). Ultraviolet reflectance patterns of male  
1348 guppies enhance their attractiveness to females. *Animal Behaviour*, 63(2), 391-396.
- 1349 63. Kodric-Brown, A., & Nicoletto, P. F. (1996). Consensus among females in their choice of  
1350 males in the guppy *Poecilia reticulata*. *Behavioral Ecology and Sociobiology*, 39(6),  
1351 395-400.
- 1352 64. Kodric-Brown, A. (1989). Dietary carotenoids and male mating success in the guppy: an  
1353 environmental component to female choice. *Behavioral Ecology and*  
1354 *Sociobiology*, 25(6), 393-401.
- 1355 65. Kodric-Brown, A. (1985). Female preference and sexual selection for male coloration in  
1356 the guppy (*Poecilia reticulata*). *Behavioral Ecology and Sociobiology*, 17(3), 199-205.
- 1357 66. Kondrashev, S. L. (2008). Long-wave sensitivity in the masked greenling (*Hexagrammos*  
1358 *octogrammus*), a shallow-water marine fish. *Vision research*, 48(21), 2269-2274.
- 1359 67. Kottler, V. A., Fadeev, A., Weigel, D., & Dreyer, C. (2013). Pigment pattern formation in  
1360 the guppy, *Poecilia reticulata*, involves the *Kita* and *Csf1ra* receptor tyrosine  
1361 kinases. *Genetics*, 194(3), 631-646.
- 1362 68. Kottler, V. A., Koch, I., Flötenmeyer, M., Hashimoto, H., Weigel, D., & Dreyer, C.  
1363 (2014). Multiple pigment cell types contribute to the black, blue, and orange  
1364 ornaments of male guppies (*Poecilia reticulata*). *PLoS one*, 9(1), e85647.
- 1365 69. Kottler, V. A., Künstner, A., Koch, I., Flötenmeyer, M., Langenecker, T., Hoffmann, M.,  
1366 ... & Dreyer, C. (2015). Adenylate cyclase 5 is required for melanophore and male  
1367 pattern development in the guppy (*Poecilia reticulata*). *Pigment cell & melanoma*  
1368 *research*, 28(5), 545-558.
- 1369 70. Laver, C. R., & Taylor, J. S. (2011). RT-qPCR reveals opsin gene upregulation associated  
1370 with age and sex in guppies (*Poecilia reticulata*)-a species with color-based sexual  
1371 selection and 11 visual-opsin genes. *BMC evolutionary biology*, 11(1), 81.
- 1372 71. Lindholm, A., & Breden, F. (2002). Sex chromosomes and sexual selection in poeciliid  
1373 fishes. *the american naturalist*, 160(S6), S214-S224.
- 1374 72. Lindholm, A. K., Sandkam, B., Pohl, K., & Breden, F. (2015). *Poecilia picta*, a close  
1375 relative to the guppy, exhibits red male coloration polymorphism: a system for  
1376 phylogenetic comparisons. *PLoS one*, 10(11), e0142089.
- 1377 73. Lisachov, A. P., Zadesenets, K. S., Rubtsov, N. B., & Borodin, P. M. (2015). Sex  
1378 chromosome synapsis and recombination in male guppies. *Zebrafish*, 12(2), 174-  
1379 180.

- 1380 74. Loew, E. R., & McFarland, W. N. (1990). The underwater visual environment. In *The*  
1381 *visual system of fish* (pp. 1-43). Springer Netherlands.
- 1382 75. Magurran, A. E. (2005). *Evolutionary ecology: the Trinidadian guppy*. Oxford University  
1383 Press on Demand.
- 1384 76. Mariette, M., Kelley, J. L., Brooks, R., & Evans, J. P. (2006). The effects of inbreeding on  
1385 male courtship behaviour and coloration in guppies. *Ethology*, *112*(8), 807-814.
- 1386 77. Martínez, C., Chavarría, C., Sharpe, D. M., & De León, L. F. (2016). Low Predictability of  
1387 Colour Polymorphism in Introduced Guppy (*Poecilia reticulata*) Populations in  
1388 Panama. *PLoS one*, *11*(2), e0148040.
- 1389 78. Millar, N. P., & Hendry, A. P. (2012). Population divergence of private and non-private  
1390 signals in wild guppies. *Environmental biology of fishes*, *94*(3), 513-525.
- 1391 79. Nakajima, M., Shinohara, E., & Fujio, Y. (1999). Fluorescent Chromatophore Detected in  
1392 the Guppy *Poecilia reticulata*. *Zoological Science*, *16*(5), 745-747.
- 1393 80. Nanda, I., Schories, S., Tripathi, N., Dreyer, C., Haaf, T., Schmid, M., & Scharl, M.  
1394 (2014). Sex chromosome polymorphism in guppies. *Chromosoma*, *123*(4),
- 1395 81. Natali, V. F., & Natali, A. I. (1931). On the problem of localization of genes in the X and  
1396 Y chromosomes of *Lebistes reticulatus*. *Z. Exp. Biol*, *7*, 41-70.
- 1397 82. Nicoletto, P. F. (1995). Offspring quality and female choice in the guppy, *Poecilia r*
- 1398 83. Olendorf, R., Rodd, F. H., Punzalan, D., Houde, A. E., Hurt, C., Reznick, D. N., &  
1399 Hughes, K. A. (2006). Frequency-dependent survival in natural guppy  
1400 populations. *Nature*, *441*(7093), 633-636.
- 1401 84. P Millar, N., N Reznick, D., T Kinnison, M., & P Hendry, A. (2006). Disentangling the  
1402 selective factors that act on male colour in wild guppies. *Oikos*, *113*(1), 1-12.
- 1403 85. Patterson, L. B., Bain, E. J., & Parichy, D. M. (2014). Pigment cell interactions and  
1404 differential xanthophore recruitment underlying zebrafish stripe reiteration and *Danio*  
1405 pattern evolution. *Nature communications*, *5*.
- 1406 86. Rennison, D. J., Owens, G. L., Allison, W. T., & Taylor, J. S. (2011). Intra-retinal  
1407 variation of opsin gene expression in the guppy (*Poecilia reticulata*). *Journal of*  
1408 *Experimental Biology*, *214*(19), 3248-3254.
- 1409 87. Rodd, F. H., Hughes, K. A., Grether, G. F., & Baril, C. T. (2002). A possible non-sexual  
1410 origin of mate preference: are male guppies mimicking fruit?. *Proceedings of the*  
1411 *Royal Society of London B: Biological Sciences*, *269*(1490), 475-481.
- 1412 88. Rodd, F. H., & Reznick, D. N. (1991). Life history evolution in guppies: III. The impact of  
1413 prawn predation on guppy life histories. *Oikos*, 13-19.
- 1414 89. Sandkam, B., Young, C. M., & Breden, F. (2015). Beauty in the eyes of the beholders:  
1415 colour vision is tuned to mate preference in the Trinidadian guppy (*Poecilia*  
1416 *reticulata*). *Molecular ecology*, *24*(3), 596-609.
- 1417 90. Sandkam, B. A., Young, C. M., Breden, F. M. W., Bourne, G. R., & Breden, F. (2015).  
1418 Color vision varies more among populations than among species of live-bearing fish  
1419 from South America. *BMC evolutionary biology*, *15*(1), 225.
- 1420 91. Saszik, Shannon, and Joseph Bilotta. "The effects of temperature on the dark-adapted  
1421 spectral sensitivity function of the adult zebrafish." *Vision research* 39.6 (1999):  
1422 1051-1058.
- 1423 92. Schröder, J. H. (1983). The guppy(*Poecilia reticulata* Peters) as a model for evolutionary  
1424 studies in genetics, behavior, and ecology. *Berichte des Naturwissenschaftlich-*  
1425 *Medizinischen Vereins in Innsbruck*, *70*, 249-279.
- 1426 93. Sheridan, L., & Pomiankowski, A. (1997). Fluctuating asymmetry, spot asymmetry and  
1427 inbreeding depression in the sexual coloration of male guppy fish. *Heredity*, *79*(5),  
1428 515-523.
- 1429 94. Singh, A. P., & Nüsslein-Volhard, C. (2015). Zebrafish stripes as a model for vertebrate  
1430 colour pattern formation. *Current Biology*, *25*(2), R81-R92.



- 1431 95. Smith, E. J., Partridge, J. C., Parsons, K. N., White, E. M., Cuthill, I. C., Bennett, A. T., &  
1432 Church, S. C. (2002). Ultraviolet vision and mate choice in the guppy (*Poecilia*  
1433 *reticulata*). *Behavioral Ecology*, *13*(1), 11-19.
- 1434 96. Tripathi, N., Hoffmann, M., Weigel, D., & Dreyer, C. (2009). Linkage analysis reveals the  
1435 independent origin of Poeciliid sex chromosomes and a case of atypical sex  
1436 inheritance in the guppy (*Poecilia reticulata*). *Genetics*, *182*(1), 365-374.
- 1437 97. Van Oosterhout, C., Trigg, R. E., Carvalho, G. R., Magurran, A. E., Hauser, L., & Shaw,  
1438 P. W. (2003). Inbreeding depression and genetic load of sexually selected traits: how  
1439 the guppy lost its spots. *Journal of evolutionary biology*, *16*(2), 273-281.
- 1440 98. Ward, M. N., Churcher, A. M., Dick, K. J., Laver, C. R., Owens, G. L., Polack, M. D., ... &  
1441 Taylor, J. S. (2008). The molecular basis of color vision in colorful fish: four long  
1442 wave-sensitive (LWS) opsins in guppies (*Poecilia reticulata*) are defined by amino  
1443 acid substitutions at key functional sites. *BMC Evolutionary Biology*, *8*(1), 210.
- 1444 99. Watson, C. T., Gray, S. M., Hoffmann, M., Lubieniecki, K. P., Joy, J. B., Sandkam, B. A.,  
1445 ... & Breden, F. (2011). Gene duplication and divergence of long wavelength-  
1446 sensitive opsin genes in the guppy, *Poecilia reticulata*. *Journal of molecular*  
1447 *evolution*, *72*(2), 240-252.
- 1448 100. Weadick, C. J., & Chang, B. S. (2007). Long-wavelength sensitive visual pigments of  
1449 the guppy (*Poecilia reticulata*): six opsins expressed in a single individual. *BMC*  
1450 *Evolutionary Biology*, *7*(1), S11.
- 1451 101. Weadick, C. J., Loew, E. R., Rodd, F. H., & Chang, B. S. (2012). Visual pigment  
1452 molecular evolution in the Trinidadian pike cichlid (*Crenicichla frenata*): a less  
1453 colorful world for Neotropical cichlids?. *Molecular biology and evolution*, *29*(10),  
1454 3045-3060.
- 1455 102. White, E. M., Partridge, J. C., & Church, S. C. (2003). Ultraviolet dermal reflexion  
1456 and mate choice in the guppy, *Poecilia reticulata*. *Animal Behaviour*, *65*(4), 693-700.
- 1457 103. Winge, Ö. (1922). A peculiar mode of inheritance and its cytological  
1458 explanation. *Journal of Genetics*, *12*(2), 137-144.
- 1459 104. Winge, Ö. (1922). One-sided masculine and sex-linked inheritance in *Lebistes*  
1460 *reticulatus*. *Journal of Genetics*, *12*(2), 145-162.
- 1461 105. Winge, Ö. (1927). The location of eighteen genes in *Lebistes reticulatus*. *Journal of*  
1462 *Genetics*, *18*(1), 1-43.
- 1463 106. Wucherer, M. F., & Michiels, N. K. (2012). A fluorescent chromatophore changes the  
1464 level of fluorescence in a reef fish. *PLoS One*, *7*(6), e37913.
- 1465 107. Wucherer, M. F., & Michiels, N. K. (2014). Regulation of red fluorescent light  
1466 emission in a cryptic marine fish. *Frontiers in zoology*, *11*(1), 1.
- 1467 108. Yamazaki, K., Boyse, E. A., Mike, V., Thaler, H. T., Mathieson, B. J., Abbott, J., ... &  
1468 Thomas, L. (1976). Control of mating preferences in mice by genes in the major  
1469 histocompatibility complex. *Journal of Experimental Medicine*, *144*(5), 1324-1335.
- 1470 109. Zajitschek, S. R., & Brooks, R. C. (2010). Inbreeding depression in male traits and  
1471 preference for outbred males in *Poecilia reticulata*. *Behavioral Ecology*, arq077.

## 1472 **Supporting Information**

1473 S1 TABLE 1 – Condensed Breeding's and Results; male x female test breeding's of *Poecilia*  
1474 *reticulata*. Generations 1,2,3. Charting and results only. (Included as appendix and  
1475 referenced in text body).

1476 S2 TABLE 2 – Expanded Breeding's and Results; male x female test breeding's of *Poecilia*  
1477 *reticulata*. Charting, results and photos of all fish. Generations 1,2,3. (Included as  
1478 appendix and referenced in text body).

1479 S3 - Materials Full Description and Sources.
